# Supplementary material for: Insights from computational analysis: how does the SARS-CoV-2 Delta (B.1.617.2) variant hijack ACE2 more effectively?
Source: Royal Society of Chemistry journal article supplement (doi:10.1039/d2cp00843b), 2022-01-01
Supplement: d2cp00843b1.pdf [file d2cp00843b1.pdf]

## Support Information

**Insights from computational analysis: how the SARS-CoV-2 Delta (B.1.617.2)  
variant hijacks ACE2 more effectively?**

*Danyang Xiong, Xiaoyu Zhao, Song Luo, Lili Duan\**

School of Physics and Electronics, Shandong Normal University, Jinan, 250014,

China

Corresponding author ([duanll@sdu.edu.cn](mailto:duanll@sdu.edu.cn))

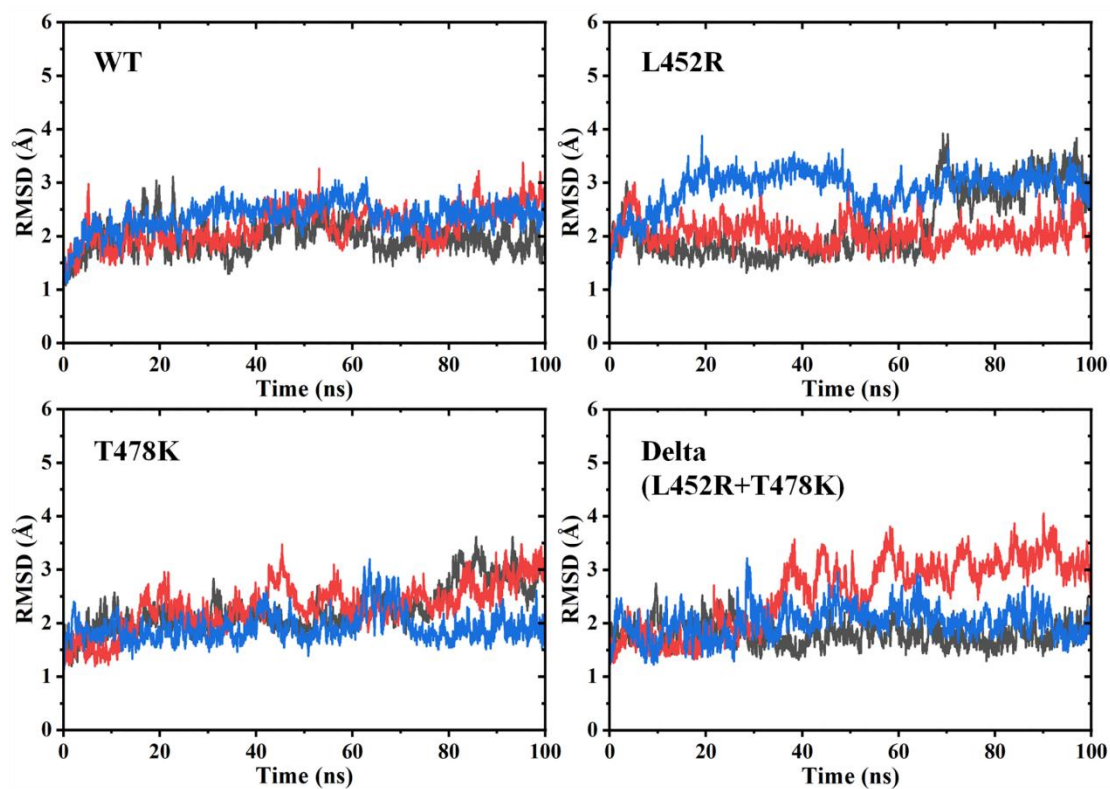

**Figure S1.** The root mean square deviation (RMSD) of the backbone atoms in three independent trajectories of WT, two single mutants systems, and the Delta variant (L452R+T478K). Different trajectories are distinguished by different colors.

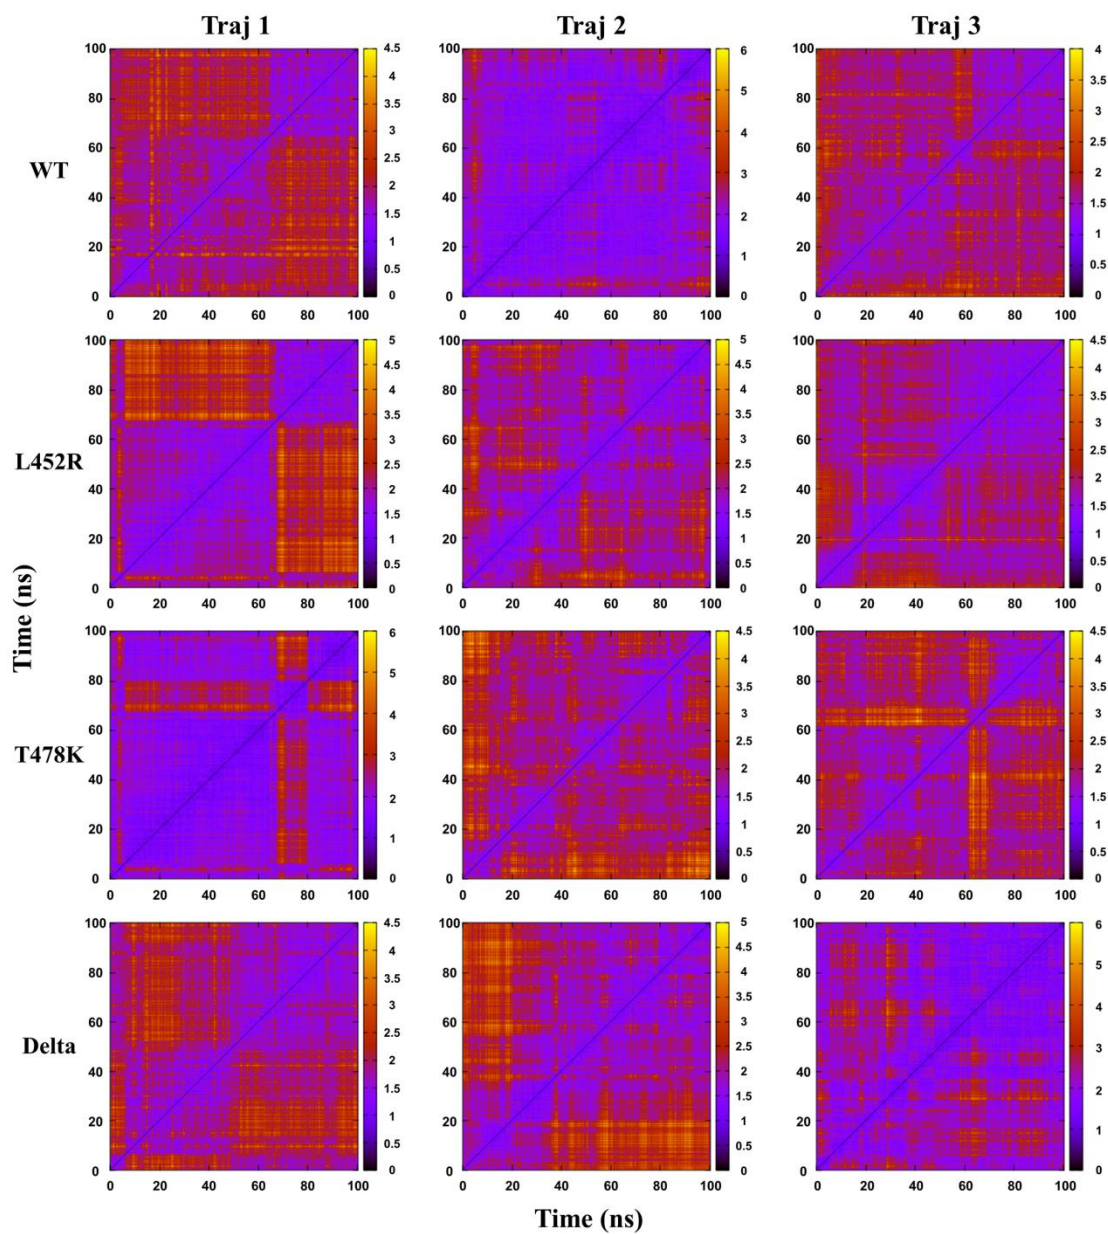

**Figure S2.** The 2D-RMSD of  $C_{\alpha}$  in three independent trajectories of WT, two single mutants systems, and the Delta variant (L452R+T478K).

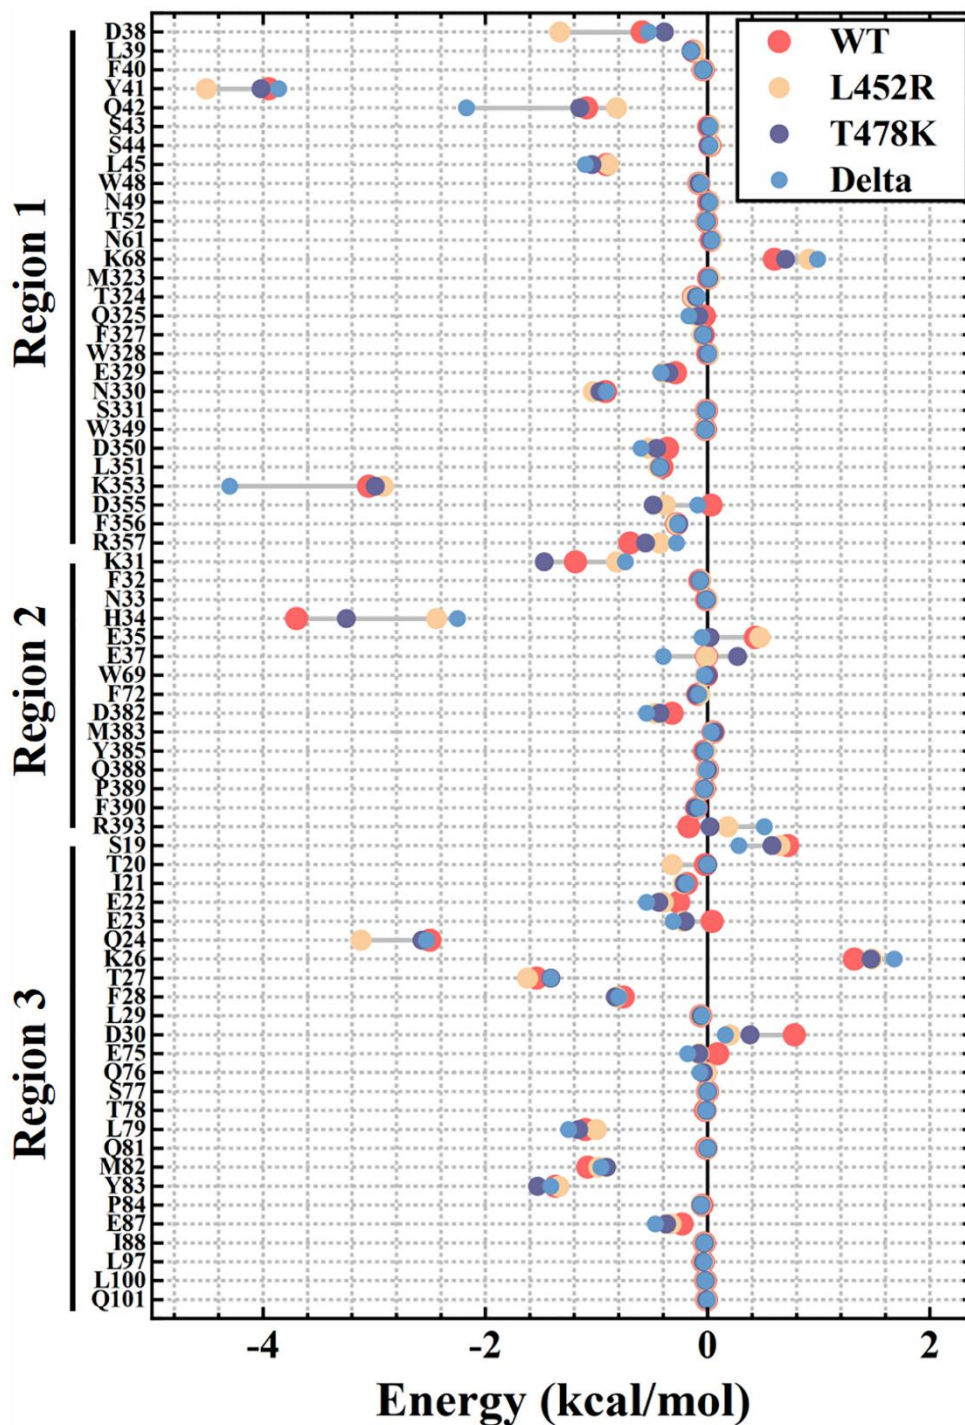

**Figure S3.** The scatter plots of the binding free energy contribution for each residue on ACE2 within 10 Å from the binding interface obtained by the ASIE method, where the WT is represented by red dots, L452R variant is orange-yellow dots, T478K variant is blue-violet dots, and Delta variant (L452R+T478K) is represented by light blue.



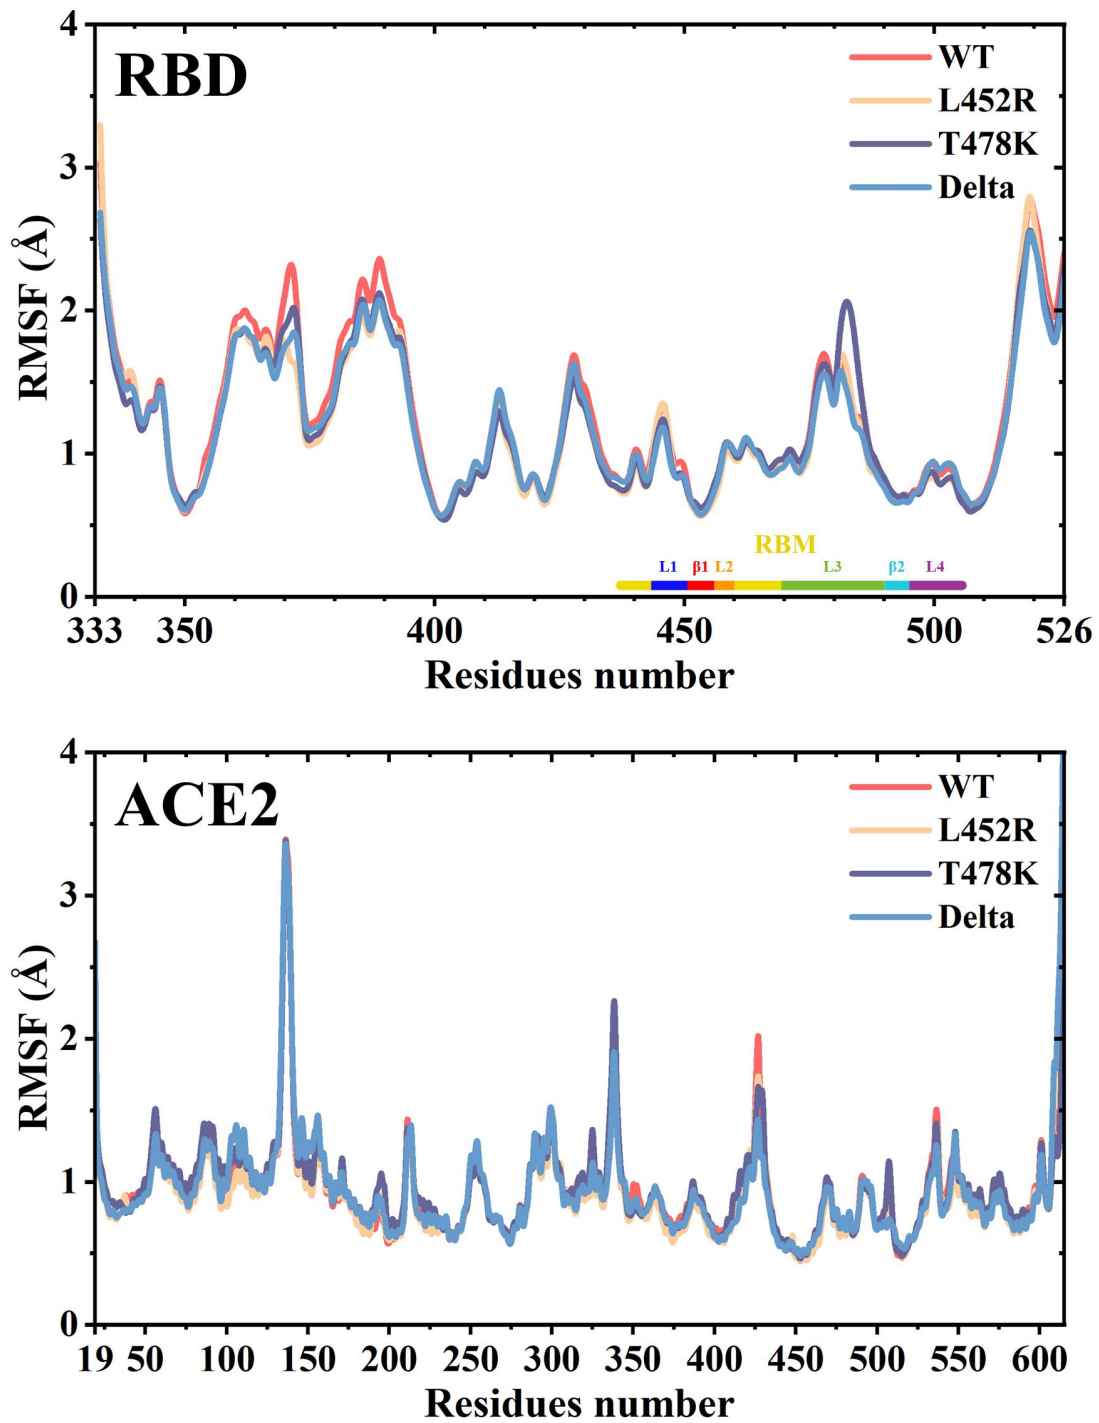

**Figure S4.** The root mean square fluctuation (RMSF) of the RBD and ACE2 of the four systems. The RBM area is specially marked by the color bar.

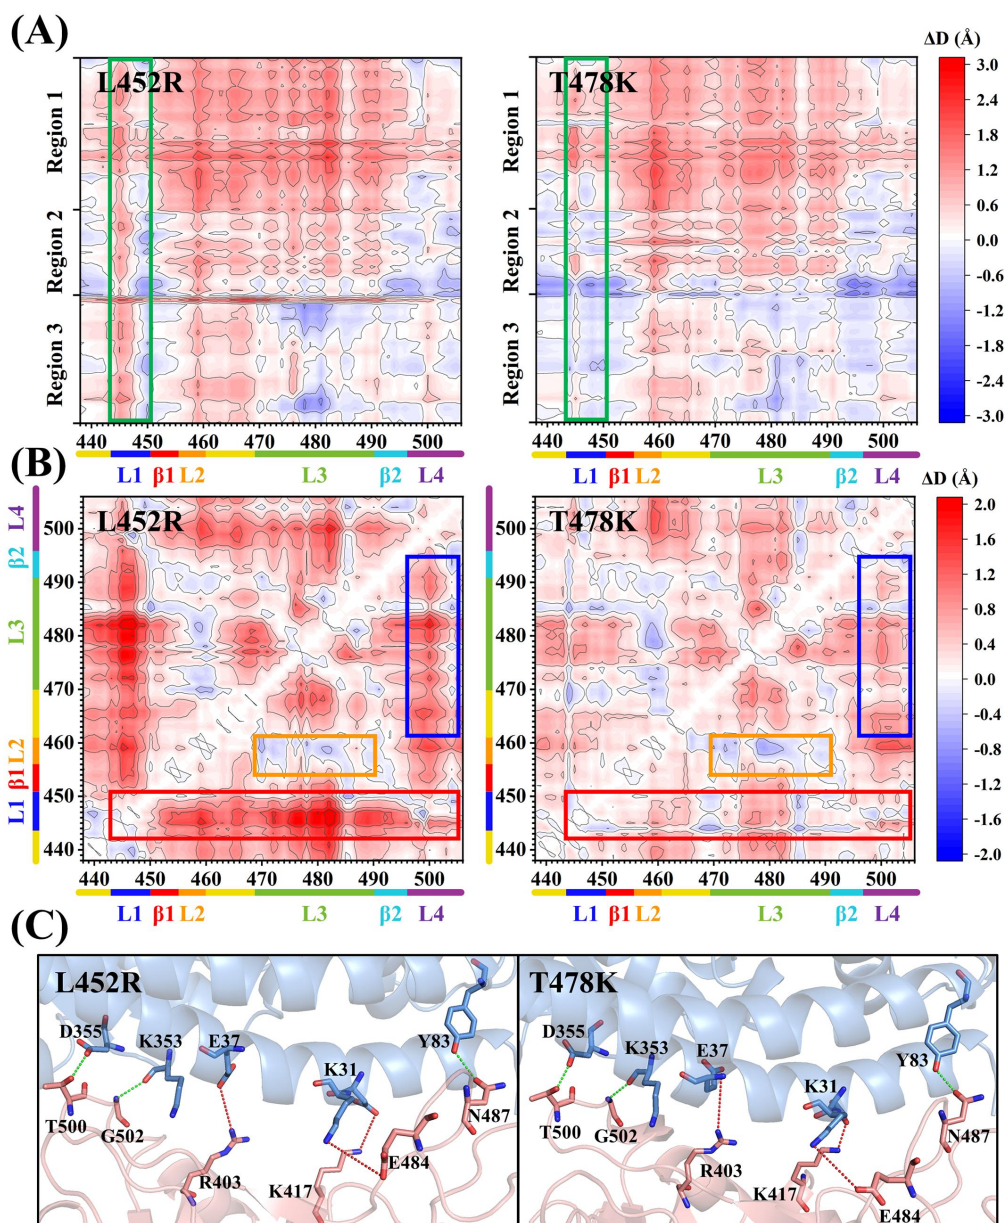

**Figure S5.** (A) Distance change between residues near RBD-ACE2 binding interface,  $\Delta D$  represents the difference between the average distance of the  $C_{\alpha}$  atoms for each residue during the simulation time and the original distance in their same initial structure. Positive values (colored in red) and negative values (colored in blue) represent the further and closer distances between residues, respectively. (B) The change of distance between residues in RBM. (C) The hydrogen bond network (occupancy greater than 70%) and salt bridge network formed at RBD-ACE2 binding interface, in which hydrogen bond is represented by the green dotted line and the salt bridge is represented by the red dotted line.

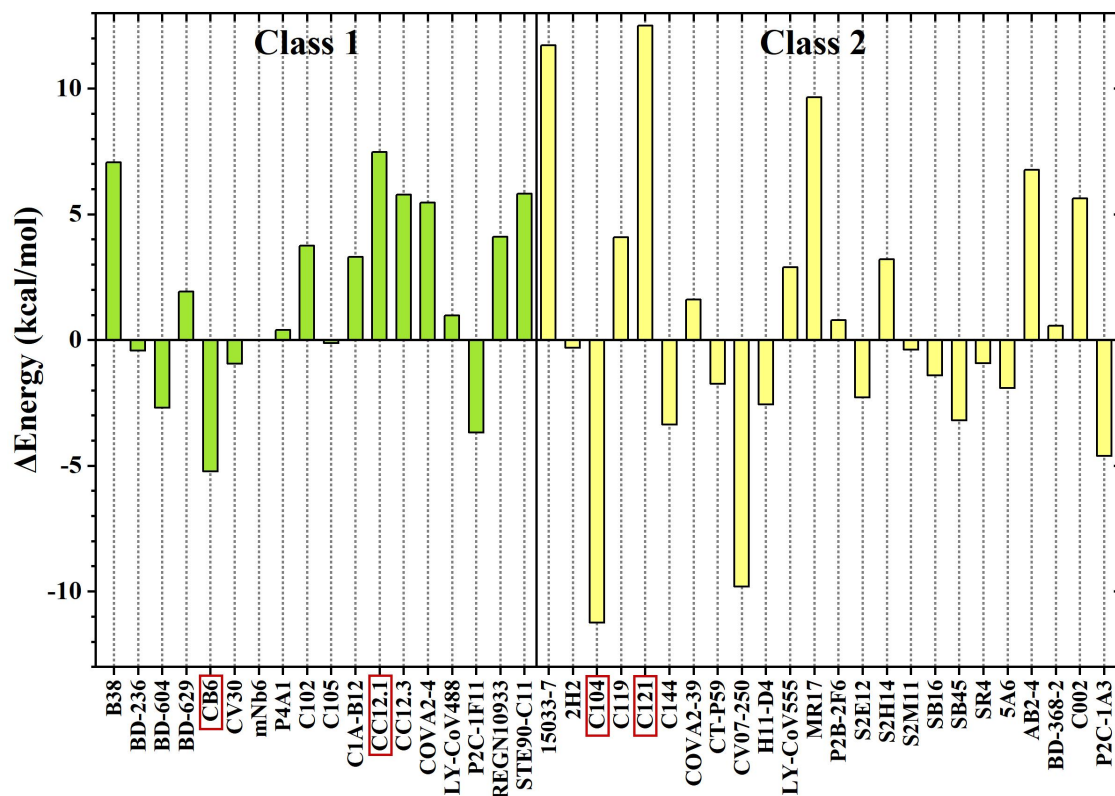

**Figure S6.** The sum of the energy contributions of each residue in the results of the ASIE is used to represent the total binding free energy, and the Class 1 and 2 antibodies are colored in green and yellow, respectively. In the two types of antibodies, the systems with the most energy increase and decrease are found, and they are marked with red rectangles.

**Table S1.** Energy terms of binding free energy for residues within 10 Å from the binding interface of RBD obtained by ASIE method (all values are in kcal/mol).

| Systems | Residues     | $\Delta\Delta E_{vdw}$ | $\Delta\Delta E_{ele}$ | $\Delta\Delta G_{gb}$ | $\Delta\Delta G_{np}$ | $\Delta\Delta H$ | $-T\Delta\Delta S$ | $\Delta\Delta G_{bind}$ |
|---------|--------------|------------------------|------------------------|-----------------------|-----------------------|------------------|--------------------|-------------------------|
| WT      | R403         | -2.02(±0.06)           | -55.47(±0.23)          | 52.09(±0.20)          | -0.28(±0.01)          | -5.67(±0.07)     | 1.33(±0.00)        | -4.34(±0.07)            |
|         | D405         | -0.24(±0.01)           | 52.03(±0.16)           | -48.61(±0.15)         | -0.01(±0.00)          | 3.18(±0.01)      | 0.62(±0.00)        | 3.79(±0.01)             |
|         | E406         | -0.23(±0.01)           | 49.80(±0.15)           | -46.59(±0.14)         | -0.01(±0.00)          | 2.97(±0.01)      | 0.56(±0.00)        | 3.53(±0.01)             |
|         | R408         | -0.18(±0.01)           | -47.68(±0.18)          | 44.73(±0.17)          | 0.00(±0.00)           | -3.13(±0.02)     | 0.67(±0.00)        | -2.46(±0.02)            |
|         | Q409         | -0.05(±0.00)           | -1.10(±0.05)           | 1.08(±0.04)           | 0.00(±0.00)           | -0.08(±0.00)     | 0.10(±0.00)        | 0.03(±0.00)             |
|         | K417         | -0.20(±0.13)           | -56.67(±0.41)          | 52.52(±0.35)          | -0.39(±0.01)          | -4.74(±0.10)     | 3.46(±0.00)        | -1.28(±0.10)            |
|         | I418         | -0.06(±0.00)           | -0.11(±0.01)           | 0.13(±0.01)           | 0.00(±0.00)           | -0.05(±0.00)     | 0.02(±0.00)        | -0.03(±0.00)            |
|         | D420         | -0.03(±0.00)           | 40.82(±0.11)           | -38.24(±0.10)         | 0.00(±0.00)           | 2.56(±0.01)      | 0.34(±0.00)        | 2.90(±0.01)             |
|         | Y421         | -0.20(±0.00)           | 0.02(±0.08)            | 0.07(±0.08)           | 0.00(±0.00)           | -0.10(±0.00)     | 0.29(±0.00)        | 0.19(±0.00)             |
|         | N422         | -0.03(±0.00)           | -0.37(±0.02)           | 0.34(±0.02)           | 0.00(±0.00)           | -0.05(±0.00)     | 0.03(±0.00)        | -0.02(±0.00)            |
|         | N437         | -0.04(±0.00)           | -0.41(±0.02)           | 0.40(±0.02)           | 0.00(±0.00)           | -0.05(±0.00)     | 0.03(±0.00)        | -0.02(±0.00)            |
|         | N439         | -0.10(±0.00)           | -0.18(±0.03)           | 0.19(±0.03)           | 0.00(±0.00)           | -0.09(±0.00)     | 0.08(±0.00)        | -0.01(±0.00)            |
|         | N440         | -0.02(±0.00)           | 0.44(±0.10)            | -0.40(±0.09)          | 0.00(±0.00)           | 0.02(±0.00)      | 0.31(±0.00)        | 0.33(±0.00)             |
|         | D442         | -0.01(±0.00)           | 41.09(±0.07)           | -38.52(±0.06)         | 0.00(±0.00)           | 2.56(±0.00)      | 0.15(±0.00)        | 2.71(±0.00)             |
|         | S443         | -0.03(±0.00)           | 0.26(±0.02)            | -0.26(±0.02)          | 0.00(±0.00)           | -0.02(±0.00)     | 0.04(±0.00)        | 0.02(±0.00)             |
|         | K444         | -0.05(±0.00)           | -43.45(±0.13)          | 40.76(±0.12)          | 0.00(±0.00)           | -2.74(±0.01)     | 0.54(±0.00)        | -2.19(±0.01)            |
|         | V445         | -0.14(±0.01)           | -0.07(±0.01)           | 0.17(±0.01)           | 0.00(±0.00)           | -0.05(±0.00)     | 0.05(±0.00)        | 0.01(±0.00)             |
|         | N448         | -0.03(±0.00)           | -0.30(±0.02)           | 0.29(±0.02)           | 0.00(±0.00)           | -0.04(±0.00)     | 0.03(±0.00)        | -0.01(±0.00)            |
|         | Y449         | -1.84(±0.15)           | -2.77(±0.17)           | 2.64(±0.13)           | -0.49(±0.01)          | -2.46(±0.12)     | 1.31(±0.00)        | -1.15(±0.12)            |
|         | Y451         | -0.04(±0.00)           | -0.32(±0.02)           | 0.32(±0.02)           | 0.00(±0.00)           | -0.05(±0.00)     | 0.02(±0.00)        | -0.02(±0.00)            |
|         | L452         | -0.07(±0.00)           | 0.18(±0.02)            | -0.14(±0.02)          | 0.00(±0.00)           | -0.04(±0.00)     | 0.05(±0.00)        | 0.01(±0.00)             |
|         | Y453         | -1.52(±0.10)           | -1.67(±0.10)           | 1.85(±0.07)           | -0.27(±0.01)          | -1.61(±0.08)     | 1.03(±0.00)        | -0.58(±0.08)            |
|         | R454         | -0.05(±0.00)           | -37.92(±0.07)          | 35.56(±0.06)          | 0.00(±0.00)           | -2.41(±0.00)     | 0.17(±0.00)        | -2.24(±0.00)            |
|         | L455         | -3.55(±0.05)           | -0.62(±0.03)           | 1.19(±0.04)           | -0.42(±0.00)          | -3.39(±0.05)     | 0.33(±0.00)        | -3.06(±0.05)            |
|         | F456         | -4.41(±0.08)           | -1.09(±0.06)           | 2.21(±0.06)           | -0.58(±0.01)          | -3.86(±0.09)     | 1.56(±0.00)        | -2.31(±0.09)            |
|         | R457         | -0.03(±0.00)           | -35.47(±0.06)          | 33.26(±0.06)          | 0.00(±0.00)           | -2.24(±0.00)     | 0.14(±0.00)        | -2.10(±0.00)            |
|         | K458         | -0.12(±0.01)           | -34.23(±0.21)          | 32.15(±0.20)          | -0.01(±0.00)          | -2.21(±0.02)     | 0.79(±0.00)        | -1.42(±0.02)            |
|         | I472         | -0.05(±0.00)           | 0.02(±0.01)            | -0.01(±0.01)          | 0.00(±0.00)           | -0.05(±0.00)     | 0.01(±0.00)        | -0.04(±0.00)            |
|         | Y473         | -1.18(±0.03)           | -1.03(±0.07)           | 1.31(±0.07)           | -0.15(±0.01)          | -1.06(±0.03)     | 0.56(±0.00)        | -0.50(±0.03)            |
|         | Q474         | -0.12(±0.00)           | -0.11(±0.04)           | 0.14(±0.04)           | 0.00(±0.00)           | -0.08(±0.00)     | 0.09(±0.00)        | 0.01(±0.00)             |
|         | S477         | -0.10(±0.02)           | -0.13(±0.12)           | 0.11(±0.09)           | -0.03(±0.01)          | -0.16(±0.04)     | 0.35(±0.00)        | 0.19(±0.04)             |
|         | T478         | -0.07(±0.01)           | 0.14(±0.04)            | -0.08(±0.04)          | 0.00(±0.00)           | -0.02(±0.01)     | 0.07(±0.00)        | 0.06(±0.01)             |
|         | C480         | -0.03(±0.00)           | 0.51(±0.02)            | -0.49(±0.02)          | 0.00(±0.00)           | -0.02(±0.00)     | 0.01(±0.00)        | -0.01(±0.00)            |
|         | V483         | -0.02(±0.00)           | -0.02(±0.01)           | 0.03(±0.01)           | 0.00(±0.00)           | -0.01(±0.00)     | 0.01(±0.00)        | 0.00(±0.00)             |
|         | E484         | -0.24(±0.02)           | 41.65(±0.16)           | -38.92(±0.15)         | -0.03(±0.01)          | 2.45(±0.02)      | 0.97(±0.00)        | 3.43(±0.02)             |
|         | F486         | -5.68(±0.14)           | -1.47(±0.08)           | 3.19(±0.09)           | -0.86(±0.02)          | -4.82(±0.14)     | 1.72(±0.00)        | -3.10(±0.14)            |
|         | N487         | -1.93(±0.11)           | -1.51(±0.09)           | 1.29(±0.05)           | -0.40(±0.01)          | -2.55(±0.09)     | 1.74(±0.00)        | -0.81(±0.09)            |
|         | C488         | -0.05(±0.00)           | -0.93(±0.02)           | 0.93(±0.02)           | 0.00(±0.00)           | -0.05(±0.00)     | 0.00(±0.00)        | -0.04(±0.00)            |
|         | Y489         | -6.21(±0.07)           | 0.55(±0.03)            | 0.30(±0.03)           | -0.84(±0.01)          | -6.19(±0.07)     | 0.67(±0.00)        | -5.52(±0.07)            |
|         | F490         | -0.13(±0.00)           | 0.29(±0.01)            | -0.20(±0.01)          | 0.00(±0.00)           | -0.04(±0.00)     | -0.01(±0.00)       | -0.04(±0.00)            |
| P491    | -0.04(±0.00) | 0.43(±0.00)            | -0.42(±0.00)           | 0.00(±0.00)           | -0.03(±0.00)          | 0.01(±0.00)      | -0.02(±0.00)       |                         |
| L492    | -0.04(±0.00) | 0.38(±0.01)            | -0.37(±0.01)           | 0.00(±0.00)           | -0.03(±0.00)          | 0.05(±0.00)      | 0.02(±0.00)        |                         |
| Q493    | -2.79(±0.18) | -9.78(±0.19)           | 7.37(±0.13)            | -0.81(±0.01)          | -6.01(±0.14)          | 3.16(±0.00)      | -2.85(±0.14)       |                         |
| S494    | -0.12(±0.01) | -0.19(±0.11)           | 0.28(±0.10)            | -0.01(±0.00)          | -0.03(±0.01)          | 0.37(±0.00)      | 0.33(±0.01)        |                         |



|      |              |               |               |              |              |             |              |
|------|--------------|---------------|---------------|--------------|--------------|-------------|--------------|
| Y495 | -0.50(±0.02) | -0.48(±0.01)  | 0.56(±0.01)   | -0.01(±0.00) | -0.43(±0.02) | 0.05(±0.00) | -0.38(±0.02) |
| F497 | -0.28(±0.00) | 0.24(±0.02)   | -0.36(±0.02)  | 0.00(±0.00)  | -0.40(±0.01) | 0.08(±0.00) | -0.31(±0.01) |
| Q498 | -3.16(±0.13) | -3.85(±0.15)  | 2.27(±0.09)   | -0.46(±0.01) | -5.19(±0.10) | 1.64(±0.00) | -3.56(±0.10) |
| P499 | -0.19(±0.00) | 0.18(±0.01)   | -0.18(±0.02)  | 0.00(±0.00)  | -0.21(±0.00) | 0.07(±0.00) | -0.13(±0.00) |
| T500 | -0.34(±0.14) | -3.61(±0.08)  | 3.34(±0.04)   | -0.28(±0.00) | -0.90(±0.11) | 1.69(±0.00) | 0.79(±0.11)  |
| N501 | -3.10(±0.07) | -3.13(±0.09)  | 2.45(±0.06)   | -0.22(±0.01) | -3.99(±0.06) | 0.85(±0.00) | -3.14(±0.06) |
| V503 | -0.39(±0.03) | 0.23(±0.01)   | -0.06(±0.02)  | -0.04(±0.01) | -0.25(±0.03) | 0.10(±0.00) | -0.16(±0.03) |
| Y505 | -6.74(±0.14) | -3.19(±0.21)  | 3.35(±0.15)   | -0.97(±0.01) | -7.55(±0.11) | 1.92(±0.00) | -5.62(±0.11) |
| Q506 | -0.32(±0.01) | -2.21(±0.02)  | 2.18(±0.02)   | 0.00(±0.00)  | -0.36(±0.01) | 0.05(±0.00) | -0.31(±0.01) |
| P507 | -0.05(±0.00) | 0.07(±0.01)   | -0.10(±0.01)  | 0.00(±0.00)  | -0.08(±0.00) | 0.00(±0.00) | -0.08(±0.00) |
| Y508 | -0.08(±0.00) | 0.20(±0.04)   | -0.18(±0.04)  | 0.00(±0.00)  | -0.06(±0.00) | 0.08(±0.00) | 0.02(±0.00)  |
| R403 | -1.45(±0.05) | -55.78(±0.24) | 52.42(±0.21)  | -0.17(±0.01) | -4.98(±0.06) | 1.33(±0.00) | -3.66(±0.07) |
| D405 | -0.20(±0.01) | 52.20(±0.14)  | -48.79(±0.13) | -0.01(±0.00) | 3.20(±0.01)  | 0.60(±0.00) | 3.81(±0.01)  |
| E406 | -0.16(±0.00) | 49.33(±0.13)  | -46.17(±0.13) | 0.00(±0.00)  | 2.99(±0.01)  | 0.50(±0.00) | 3.49(±0.01)  |
| R408 | -0.18(±0.01) | -48.21(±0.14) | 45.23(±0.13)  | 0.00(±0.00)  | -3.17(±0.01) | 0.57(±0.00) | -2.60(±0.01) |
| Q409 | -0.05(±0.00) | -1.00(±0.06)  | 0.99(±0.06)   | 0.00(±0.00)  | -0.06(±0.00) | 0.12(±0.00) | 0.06(±0.00)  |
| K417 | -0.48(±0.12) | -55.57(±0.39) | 51.53(±0.32)  | -0.35(±0.01) | -4.87(±0.10) | 3.05(±0.00) | -1.81(±0.10) |
| I418 | -0.05(±0.00) | -0.14(±0.01)  | 0.16(±0.01)   | 0.00(±0.00)  | -0.04(±0.00) | 0.02(±0.00) | -0.02(±0.00) |
| D420 | -0.02(±0.00) | 40.62(±0.11)  | -38.05(±0.10) | 0.00(±0.00)  | 2.54(±0.01)  | 0.33(±0.00) | 2.87(±0.01)  |
| Y421 | -0.19(±0.00) | 0.16(±0.07)   | -0.07(±0.07)  | 0.00(±0.00)  | -0.09(±0.00) | 0.26(±0.00) | 0.17(±0.00)  |
| N422 | -0.03(±0.00) | -0.32(±0.02)  | 0.31(±0.02)   | 0.00(±0.00)  | -0.05(±0.00) | 0.03(±0.00) | -0.01(±0.00) |
| N437 | -0.05(±0.00) | -0.35(±0.02)  | 0.35(±0.02)   | 0.00(±0.00)  | -0.06(±0.00) | 0.05(±0.00) | -0.01(±0.00) |
| N439 | -0.11(±0.00) | -0.34(±0.04)  | 0.36(±0.04)   | 0.00(±0.00)  | -0.10(±0.00) | 0.10(±0.00) | 0.01(±0.00)  |
| N440 | -0.02(±0.00) | 0.22(±0.10)   | -0.18(±0.10)  | 0.00(±0.00)  | 0.02(±0.00)  | 0.34(±0.00) | 0.35(±0.00)  |
| D442 | -0.01(±0.00) | 41.89(±0.06)  | -39.27(±0.06) | 0.00(±0.00)  | 2.61(±0.00)  | 0.15(±0.00) | 2.76(±0.00)  |
| S443 | -0.03(±0.00) | 0.26(±0.03)   | -0.25(±0.03)  | 0.00(±0.00)  | -0.02(±0.00) | 0.04(±0.00) | 0.02(±0.00)  |
| K444 | -0.05(±0.00) | -44.31(±0.14) | 41.57(±0.14)  | 0.00(±0.00)  | -2.79(±0.01) | 0.56(±0.00) | -2.23(±0.01) |
| V445 | -0.13(±0.01) | -0.03(±0.01)  | 0.12(±0.01)   | 0.00(±0.00)  | -0.04(±0.00) | 0.07(±0.00) | 0.03(±0.00)  |
| N448 | -0.03(±0.00) | -0.27(±0.02)  | 0.26(±0.02)   | 0.00(±0.00)  | -0.04(±0.00) | 0.04(±0.00) | 0.00(±0.00)  |
| Y449 | -1.96(±0.13) | -1.84(±0.23)  | 1.81(±0.19)   | -0.39(±0.01) | -2.38(±0.10) | 1.03(±0.00) | -1.35(±0.10) |
| Y451 | -0.03(±0.00) | -0.39(±0.01)  | 0.38(±0.01)   | 0.00(±0.00)  | -0.05(±0.00) | 0.01(±0.00) | -0.04(±0.00) |
| R452 | -0.08(±0.00) | -41.55(±0.14) | 38.98(±0.13)  | 0.00(±0.00)  | -2.65(±0.01) | 0.48(±0.00) | -2.16(±0.01) |
| Y453 | -1.40(±0.08) | -1.19(±0.10)  | 1.52(±0.07)   | -0.25(±0.01) | -1.32(±0.06) | 0.73(±0.00) | -0.59(±0.06) |
| R454 | -0.05(±0.00) | -38.23(±0.07) | 35.85(±0.06)  | 0.00(±0.00)  | -2.43(±0.00) | 0.17(±0.00) | -2.26(±0.00) |
| L455 | -3.76(±0.06) | -0.72(±0.03)  | 1.39(±0.04)   | -0.46(±0.01) | -3.55(±0.06) | 0.39(±0.00) | -3.16(±0.06) |
| F456 | -4.44(±0.08) | -1.09(±0.07)  | 2.24(±0.07)   | -0.58(±0.01) | -3.87(±0.08) | 1.51(±0.00) | -2.36(±0.08) |
| R457 | -0.02(±0.00) | -35.73(±0.06) | 33.50(±0.06)  | 0.00(±0.00)  | -2.25(±0.00) | 0.13(±0.00) | -2.12(±0.00) |
| K458 | -0.08(±0.01) | -34.66(±0.17) | 32.54(±0.16)  | 0.00(±0.00)  | -2.20(±0.02) | 0.63(±0.00) | -1.58(±0.02) |
| I472 | -0.05(±0.00) | 0.04(±0.01)   | -0.03(±0.01)  | 0.00(±0.00)  | -0.05(±0.00) | 0.00(±0.00) | -0.04(±0.00) |
| Y473 | -1.06(±0.03) | -0.86(±0.07)  | 1.10(±0.07)   | -0.13(±0.00) | -0.95(±0.03) | 0.46(±0.00) | -0.49(±0.03) |
| Q474 | -0.13(±0.00) | -0.32(±0.04)  | 0.34(±0.03)   | 0.00(±0.00)  | -0.10(±0.00) | 0.07(±0.00) | -0.03(±0.00) |
| S477 | -0.15(±0.05) | -0.57(±0.12)  | 0.32(±0.09)   | -0.08(±0.01) | -0.48(±0.06) | 0.49(±0.00) | 0.01(±0.06)  |
| T478 | 0.08(±0.03)  | -0.39(±0.07)  | 0.28(±0.05)   | -0.01(±0.00) | -0.02(±0.02) | 0.32(±0.00) | 0.29(±0.02)  |
| C480 | -0.04(±0.00) | 0.74(±0.02)   | -0.73(±0.02)  | 0.00(±0.00)  | -0.02(±0.00) | 0.01(±0.00) | -0.01(±0.00) |
| V483 | -0.02(±0.00) | 0.00(±0.01)   | 0.01(±0.01)   | 0.00(±0.00)  | -0.01(±0.00) | 0.01(±0.00) | 0.00(±0.00)  |
| E484 | -0.25(±0.02) | 42.58(±0.19)  | -39.79(±0.17) | -0.04(±0.01) | 2.50(±0.03)  | 1.10(±0.00) | 3.61(±0.03)  |
| F486 | -6.29(±0.12) | -1.43(±0.08)  | 3.31(±0.07)   | -0.93(±0.02) | -5.34(±0.12) | 1.64(±0.00) | -3.70(±0.12) |
| N487 | -1.62(±0.13) | -1.79(±0.08)  | 1.42(±0.04)   | -0.36(±0.00) | -2.35(±0.11) | 1.79(±0.00) | -0.56(±0.11) |
| C488 | -0.05(±0.00) | -0.76(±0.02)  | 0.76(±0.02)   | 0.00(±0.00)  | -0.05(±0.00) | 0.00(±0.00) | -0.05(±0.00) |

L452R

|      |              |               |               |              |              |              |              |
|------|--------------|---------------|---------------|--------------|--------------|--------------|--------------|
| Y489 | -5.99(±0.08) | 0.50(±0.03)   | 0.31(±0.03)   | -0.84(±0.01) | -6.01(±0.08) | 0.77(±0.00)  | -5.25(±0.08) |
| F490 | -0.12(±0.00) | 0.28(±0.01)   | -0.19(±0.01)  | 0.00(±0.00)  | -0.04(±0.00) | -0.01(±0.00) | -0.05(±0.00) |
| P491 | -0.04(±0.00) | 0.44(±0.00)   | -0.43(±0.01)  | 0.00(±0.00)  | -0.03(±0.00) | 0.01(±0.00)  | -0.01(±0.00) |
| L492 | -0.04(±0.00) | 0.41(±0.01)   | -0.40(±0.01)  | 0.00(±0.00)  | -0.03(±0.00) | 0.06(±0.00)  | 0.03(±0.00)  |
| Q493 | -2.37(±0.18) | -10.34(±0.22) | 8.02(±0.15)   | -0.82(±0.01) | -5.51(±0.14) | 3.19(±0.00)  | -2.32(±0.14) |
| S494 | -0.07(±0.01) | -0.45(±0.09)  | 0.51(±0.09)   | -0.01(±0.00) | -0.01(±0.01) | 0.32(±0.00)  | 0.31(±0.01)  |
| Y495 | -0.36(±0.02) | -0.72(±0.02)  | 0.79(±0.02)   | 0.00(±0.00)  | -0.29(±0.01) | 0.06(±0.00)  | -0.24(±0.01) |
| F497 | -0.28(±0.01) | 0.38(±0.02)   | -0.59(±0.03)  | 0.00(±0.00)  | -0.49(±0.02) | 0.10(±0.00)  | -0.39(±0.02) |
| Q498 | -2.67(±0.16) | -5.71(±0.14)  | 2.76(±0.07)   | -0.46(±0.01) | -6.07(±0.13) | 2.28(±0.00)  | -3.80(±0.13) |
| P499 | -0.22(±0.00) | 0.21(±0.01)   | -0.23(±0.01)  | 0.00(±0.00)  | -0.24(±0.01) | 0.09(±0.00)  | -0.15(±0.01) |
| T500 | -0.54(±0.14) | -3.67(±0.08)  | 3.40(±0.04)   | -0.29(±0.00) | -1.11(±0.11) | 1.51(±0.00)  | 0.40(±0.11)  |
| N501 | -3.27(±0.07) | -5.89(±0.11)  | 4.50(±0.06)   | -0.19(±0.01) | -4.85(±0.08) | 1.23(±0.00)  | -3.61(±0.08) |
| V503 | -0.56(±0.04) | 0.23(±0.01)   | 0.00(±0.02)   | -0.06(±0.01) | -0.38(±0.03) | 0.14(±0.00)  | -0.24(±0.03) |
| Y505 | -6.56(±0.15) | -3.41(±0.23)  | 3.54(±0.17)   | -0.94(±0.01) | -7.37(±0.13) | 2.08(±0.00)  | -5.29(±0.13) |
| Q506 | -0.39(±0.02) | -2.32(±0.04)  | 2.28(±0.03)   | -0.01(±0.00) | -0.44(±0.02) | 0.08(±0.00)  | -0.36(±0.02) |
| P507 | -0.05(±0.00) | 0.07(±0.00)   | -0.11(±0.00)  | 0.00(±0.00)  | -0.09(±0.00) | 0.00(±0.00)  | -0.09(±0.00) |
| Y508 | -0.09(±0.00) | 0.29(±0.04)   | -0.26(±0.04)  | 0.00(±0.00)  | -0.06(±0.00) | 0.07(±0.00)  | 0.00(±0.00)  |
| R403 | -1.41(±0.04) | -55.48(±0.19) | 52.03(±0.17)  | -0.13(±0.01) | -5.00(±0.06) | 1.08(±0.00)  | -3.92(±0.06) |
| D405 | -0.24(±0.01) | 52.17(±0.15)  | -48.75(±0.14) | -0.01(±0.00) | 3.18(±0.01)  | 0.60(±0.00)  | 3.77(±0.01)  |
| E406 | -0.17(±0.00) | 49.67(±0.14)  | -46.48(±0.13) | 0.00(±0.00)  | 3.01(±0.01)  | 0.53(±0.00)  | 3.54(±0.01)  |
| R408 | -0.19(±0.01) | -47.87(±0.14) | 44.91(±0.13)  | 0.00(±0.00)  | -3.15(±0.02) | 0.63(±0.00)  | -2.52(±0.02) |
| Q409 | -0.05(±0.00) | -1.28(±0.04)  | 1.26(±0.04)   | 0.00(±0.00)  | -0.07(±0.00) | 0.09(±0.00)  | 0.02(±0.00)  |
| K417 | -0.39(±0.09) | -53.33(±0.42) | 49.80(±0.36)  | -0.24(±0.01) | -4.16(±0.08) | 2.53(±0.00)  | -1.63(±0.08) |
| I418 | -0.05(±0.00) | -0.18(±0.01)  | 0.20(±0.01)   | 0.00(±0.00)  | -0.03(±0.00) | 0.02(±0.00)  | -0.02(±0.00) |
| D420 | -0.02(±0.00) | 39.90(±0.11)  | -37.38(±0.10) | 0.00(±0.00)  | 2.50(±0.01)  | 0.32(±0.00)  | 2.82(±0.01)  |
| Y421 | -0.17(±0.00) | 0.14(±0.07)   | -0.04(±0.07)  | 0.00(±0.00)  | -0.08(±0.00) | 0.24(±0.00)  | 0.17(±0.00)  |
| N422 | -0.03(±0.00) | -0.23(±0.02)  | 0.22(±0.02)   | 0.00(±0.00)  | -0.04(±0.00) | 0.03(±0.00)  | -0.01(±0.00) |
| N437 | -0.05(±0.00) | -0.35(±0.02)  | 0.34(±0.02)   | 0.00(±0.00)  | -0.06(±0.00) | 0.04(±0.00)  | -0.02(±0.00) |
| N439 | -0.11(±0.00) | -0.41(±0.04)  | 0.42(±0.04)   | 0.00(±0.00)  | -0.11(±0.00) | 0.09(±0.00)  | -0.02(±0.00) |
| N440 | -0.02(±0.00) | 0.20(±0.08)   | -0.17(±0.08)  | 0.00(±0.00)  | 0.01(±0.00)  | 0.26(±0.00)  | 0.27(±0.00)  |
| D442 | -0.01(±0.00) | 41.45(±0.07)  | -38.86(±0.06) | 0.00(±0.00)  | 2.58(±0.00)  | 0.15(±0.00)  | 2.73(±0.00)  |
| S443 | -0.02(±0.00) | 0.03(±0.03)   | -0.03(±0.03)  | 0.00(±0.00)  | -0.03(±0.00) | 0.06(±0.00)  | 0.03(±0.00)  |
| K444 | -0.05(±0.00) | -43.39(±0.14) | 40.71(±0.13)  | 0.00(±0.00)  | -2.73(±0.01) | 0.49(±0.00)  | -2.24(±0.01) |
| V445 | -0.14(±0.01) | -0.05(±0.01)  | 0.13(±0.01)   | 0.00(±0.00)  | -0.05(±0.01) | 0.06(±0.00)  | 0.00(±0.01)  |
| N448 | -0.03(±0.00) | -0.32(±0.02)  | 0.31(±0.02)   | 0.00(±0.00)  | -0.04(±0.00) | 0.03(±0.00)  | -0.01(±0.00) |
| Y449 | -0.90(±0.12) | -3.77(±0.27)  | 3.46(±0.22)   | -0.38(±0.02) | -1.59(±0.11) | 1.51(±0.00)  | -0.08(±0.11) |
| Y451 | -0.03(±0.00) | -0.40(±0.01)  | 0.39(±0.01)   | 0.00(±0.00)  | -0.05(±0.00) | 0.00(±0.00)  | -0.04(±0.00) |
| L452 | -0.07(±0.00) | 0.14(±0.02)   | -0.10(±0.02)  | 0.00(±0.00)  | -0.03(±0.00) | 0.05(±0.00)  | 0.01(±0.00)  |
| Y453 | -1.49(±0.08) | -1.41(±0.07)  | 1.68(±0.05)   | -0.22(±0.00) | -1.44(±0.07) | 0.78(±0.00)  | -0.66(±0.07) |
| R454 | -0.05(±0.00) | -37.61(±0.07) | 35.27(±0.07)  | 0.00(±0.00)  | -2.39(±0.00) | 0.17(±0.00)  | -2.22(±0.00) |
| L455 | -3.49(±0.06) | -0.69(±0.03)  | 1.31(±0.04)   | -0.42(±0.01) | -3.29(±0.05) | 0.27(±0.00)  | -3.02(±0.06) |
| F456 | -4.17(±0.09) | -0.98(±0.06)  | 2.11(±0.06)   | -0.56(±0.01) | -3.60(±0.08) | 1.51(±0.00)  | -2.08(±0.08) |
| R457 | -0.02(±0.00) | -35.00(±0.06) | 32.82(±0.06)  | 0.00(±0.00)  | -2.21(±0.00) | 0.13(±0.00)  | -2.08(±0.00) |
| K458 | -0.10(±0.01) | -33.99(±0.19) | 31.92(±0.17)  | 0.00(±0.00)  | -2.17(±0.02) | 0.70(±0.00)  | -1.47(±0.02) |
| I472 | -0.05(±0.00) | 0.03(±0.01)   | -0.03(±0.01)  | 0.00(±0.00)  | -0.05(±0.00) | 0.00(±0.00)  | -0.04(±0.00) |
| Y473 | -1.09(±0.03) | -0.83(±0.08)  | 1.09(±0.08)   | -0.14(±0.01) | -0.97(±0.03) | 0.52(±0.00)  | -0.45(±0.03) |
| Q474 | -0.14(±0.01) | -0.04(±0.04)  | 0.08(±0.04)   | 0.00(±0.00)  | -0.10(±0.01) | 0.09(±0.00)  | -0.01(±0.01) |
| S477 | -0.07(±0.04) | -0.52(±0.14)  | 0.38(±0.10)   | -0.05(±0.01) | -0.26(±0.04) | 0.60(±0.00)  | 0.33(±0.04)  |
| K478 | -0.10(±0.01) | -37.41(±0.18) | 35.13(±0.17)  | 0.00(±0.00)  | -2.38(±0.01) | 1.34(±0.00)  | -1.04(±0.01) |

T478K

|  |             |              |               |               |              |              |             |              |
|--|-------------|--------------|---------------|---------------|--------------|--------------|-------------|--------------|
|  | <b>C480</b> | -0.03(±0.00) | 0.54(±0.02)   | -0.52(±0.02)  | 0.00(±0.00)  | -0.02(±0.00) | 0.01(±0.00) | 0.00(±0.00)  |
|  | <b>V483</b> | -0.02(±0.00) | -0.01(±0.01)  | 0.02(±0.01)   | 0.00(±0.00)  | -0.01(±0.00) | 0.01(±0.00) | 0.00(±0.00)  |
|  | <b>E484</b> | -0.26(±0.02) | 41.57(±0.16)  | -38.85(±0.14) | -0.04(±0.01) | 2.42(±0.03)  | 1.04(±0.00) | 3.46(±0.03)  |
|  | <b>F486</b> | -6.55(±0.12) | -1.54(±0.07)  | 3.45(±0.07)   | -0.94(±0.01) | -5.58(±0.12) | 1.57(±0.00) | -4.01(±0.12) |
|  | <b>N487</b> | -1.64(±0.14) | -1.72(±0.09)  | 1.35(±0.05)   | -0.36(±0.00) | -2.37(±0.11) | 1.83(±0.00) | -0.54(±0.11) |
|  | <b>C488</b> | -0.05(±0.00) | -0.89(±0.02)  | 0.89(±0.02)   | 0.00(±0.00)  | -0.05(±0.00) | 0.00(±0.00) | -0.04(±0.00) |
|  | <b>Y489</b> | -6.10(±0.07) | 0.43(±0.04)   | 0.40(±0.03)   | -0.85(±0.01) | -6.12(±0.07) | 0.79(±0.00) | -5.32(±0.07) |
|  | <b>F490</b> | -0.14(±0.00) | 0.25(±0.01)   | -0.15(±0.01)  | 0.00(±0.00)  | -0.04(±0.00) | 0.00(±0.00) | -0.04(±0.00) |
|  | <b>P491</b> | -0.04(±0.00) | 0.42(±0.01)   | -0.40(±0.01)  | 0.00(±0.00)  | -0.03(±0.00) | 0.01(±0.00) | -0.02(±0.00) |
|  | <b>L492</b> | -0.04(±0.00) | 0.41(±0.01)   | -0.40(±0.01)  | 0.00(±0.00)  | -0.03(±0.00) | 0.05(±0.00) | 0.02(±0.00)  |
|  | <b>Q493</b> | -2.83(±0.17) | -7.26(±0.33)  | 5.58(±0.25)   | -0.78(±0.01) | -5.29(±0.13) | 2.68(±0.00) | -2.61(±0.13) |
|  | <b>S494</b> | -0.09(±0.01) | -0.04(±0.09)  | 0.14(±0.09)   | -0.01(±0.00) | -0.01(±0.00) | 0.26(±0.00) | 0.25(±0.00)  |
|  | <b>Y495</b> | -0.47(±0.02) | -0.71(±0.02)  | 0.78(±0.02)   | -0.01(±0.00) | -0.41(±0.02) | 0.06(±0.00) | -0.36(±0.02) |
|  | <b>F497</b> | -0.25(±0.00) | 0.12(±0.02)   | -0.24(±0.02)  | 0.00(±0.00)  | -0.38(±0.01) | 0.06(±0.00) | -0.32(±0.01) |
|  | <b>Q498</b> | -2.78(±0.16) | -5.41(±0.15)  | 2.85(±0.08)   | -0.52(±0.01) | -5.86(±0.16) | 2.18(±0.00) | -3.68(±0.16) |
|  | <b>P499</b> | -0.21(±0.00) | 0.21(±0.01)   | -0.22(±0.01)  | 0.00(±0.00)  | -0.23(±0.01) | 0.09(±0.00) | -0.13(±0.01) |
|  | <b>T500</b> | -0.53(±0.14) | -3.58(±0.08)  | 3.31(±0.04)   | -0.29(±0.00) | -1.09(±0.11) | 1.46(±0.00) | 0.37(±0.11)  |
|  | <b>N501</b> | -3.41(±0.06) | -4.14(±0.15)  | 3.34(±0.11)   | -0.22(±0.01) | -4.43(±0.07) | 1.07(±0.00) | -3.36(±0.07) |
|  | <b>V503</b> | -0.50(±0.03) | 0.23(±0.01)   | 0.00(±0.02)   | -0.05(±0.01) | -0.32(±0.03) | 0.13(±0.00) | -0.19(±0.03) |
|  | <b>Y505</b> | -6.48(±0.15) | -4.03(±0.21)  | 3.99(±0.15)   | -0.96(±0.01) | -7.49(±0.12) | 2.21(±0.00) | -5.27(±0.12) |
|  | <b>Q506</b> | -0.37(±0.01) | -2.21(±0.03)  | 2.19(±0.03)   | -0.01(±0.00) | -0.40(±0.01) | 0.06(±0.00) | -0.34(±0.01) |
|  | <b>P507</b> | -0.05(±0.00) | 0.06(±0.01)   | -0.10(±0.01)  | 0.00(±0.00)  | -0.09(±0.00) | 0.00(±0.00) | -0.08(±0.00) |
|  | <b>Y508</b> | -0.09(±0.00) | 0.11(±0.05)   | -0.09(±0.05)  | 0.00(±0.00)  | -0.07(±0.00) | 0.10(±0.00) | 0.03(±0.00)  |
|  | <b>R403</b> | -1.33(±0.05) | -56.93(±0.25) | 53.21(±0.20)  | -0.18(±0.01) | -5.22(±0.08) | 1.41(±0.00) | -3.81(±0.08) |
|  | <b>D405</b> | -0.22(±0.01) | 52.00(±0.13)  | -48.60(±0.12) | -0.01(±0.00) | 3.18(±0.01)  | 0.65(±0.00) | 3.83(±0.01)  |
|  | <b>E406</b> | -0.17(±0.00) | 49.30(±0.13)  | -46.13(±0.13) | -0.01(±0.00) | 2.99(±0.01)  | 0.51(±0.00) | 3.50(±0.01)  |
|  | <b>R408</b> | -0.14(±0.01) | -46.86(±0.16) | 43.97(±0.15)  | 0.00(±0.00)  | -3.03(±0.02) | 0.64(±0.00) | -2.40(±0.02) |
|  | <b>Q409</b> | -0.04(±0.00) | -1.07(±0.05)  | 1.05(±0.05)   | 0.00(±0.00)  | -0.07(±0.00) | 0.11(±0.00) | 0.04(±0.00)  |
|  | <b>K417</b> | -0.41(±0.10) | -52.94(±0.43) | 49.36(±0.37)  | -0.26(±0.01) | -4.26(±0.10) | 2.56(±0.00) | -1.70(±0.10) |
|  | <b>I418</b> | -0.05(±0.00) | -0.12(±0.01)  | 0.14(±0.01)   | 0.00(±0.00)  | -0.03(±0.00) | 0.02(±0.00) | -0.01(±0.00) |
|  | <b>D420</b> | -0.02(±0.00) | 40.38(±0.11)  | -37.83(±0.10) | 0.00(±0.00)  | 2.53(±0.01)  | 0.34(±0.00) | 2.87(±0.01)  |
|  | <b>Y421</b> | -0.16(±0.00) | 0.22(±0.07)   | -0.13(±0.07)  | 0.00(±0.00)  | -0.07(±0.00) | 0.22(±0.00) | 0.15(±0.00)  |
|  | <b>N422</b> | -0.03(±0.00) | -0.17(±0.02)  | 0.15(±0.02)   | 0.00(±0.00)  | -0.04(±0.00) | 0.03(±0.00) | -0.01(±0.00) |
|  | <b>N437</b> | -0.05(±0.00) | -0.28(±0.02)  | 0.28(±0.02)   | 0.00(±0.00)  | -0.06(±0.00) | 0.04(±0.00) | -0.02(±0.00) |
|  | <b>N439</b> | -0.12(±0.00) | -0.19(±0.04)  | 0.21(±0.03)   | 0.00(±0.00)  | -0.10(±0.00) | 0.09(±0.00) | -0.01(±0.00) |
|  | <b>N440</b> | -0.02(±0.00) | 0.34(±0.10)   | -0.30(±0.09)  | 0.00(±0.00)  | 0.02(±0.00)  | 0.30(±0.00) | 0.32(±0.00)  |
|  | <b>D442</b> | -0.01(±0.00) | 41.83(±0.06)  | -39.21(±0.06) | 0.00(±0.00)  | 2.61(±0.00)  | 0.15(±0.00) | 2.75(±0.00)  |
|  | <b>S443</b> | -0.02(±0.00) | -0.01(±0.03)  | 0.01(±0.03)   | 0.00(±0.00)  | -0.02(±0.00) | 0.05(±0.00) | 0.03(±0.00)  |
|  | <b>K444</b> | -0.05(±0.00) | -44.09(±0.14) | 41.37(±0.14)  | 0.00(±0.00)  | -2.77(±0.01) | 0.47(±0.00) | -2.31(±0.01) |
|  | <b>V445</b> | -0.21(±0.01) | -0.04(±0.01)  | 0.14(±0.01)   | -0.01(±0.00) | -0.12(±0.01) | 0.07(±0.00) | -0.06(±0.01) |
|  | <b>N448</b> | -0.03(±0.00) | -0.23(±0.02)  | 0.22(±0.02)   | 0.00(±0.00)  | -0.04(±0.00) | 0.03(±0.00) | 0.00(±0.00)  |
|  | <b>Y449</b> | -1.40(±0.15) | -5.15(±0.15)  | 4.39(±0.10)   | -0.50(±0.01) | -2.66(±0.13) | 2.12(±0.00) | -0.54(±0.13) |
|  | <b>Y451</b> | -0.04(±0.00) | -0.29(±0.02)  | 0.28(±0.02)   | 0.00(±0.00)  | -0.04(±0.00) | 0.02(±0.00) | -0.02(±0.00) |
|  | <b>R452</b> | -0.09(±0.00) | -42.03(±0.12) | 39.44(±0.12)  | 0.00(±0.00)  | -2.68(±0.01) | 0.46(±0.00) | -2.22(±0.01) |
|  | <b>Y453</b> | -1.39(±0.05) | -1.16(±0.07)  | 1.51(±0.06)   | -0.22(±0.00) | -1.25(±0.04) | 0.50(±0.00) | -0.75(±0.04) |
|  | <b>R454</b> | -0.05(±0.00) | -38.14(±0.08) | 35.76(±0.08)  | 0.00(±0.00)  | -2.42(±0.01) | 0.16(±0.00) | -2.26(±0.01) |
|  | <b>L455</b> | -3.48(±0.06) | -0.63(±0.03)  | 1.28(±0.03)   | -0.44(±0.01) | -3.27(±0.06) | 0.34(±0.00) | -2.93(±0.06) |
|  | <b>F456</b> | -4.00(±0.10) | -0.87(±0.06)  | 1.98(±0.07)   | -0.53(±0.01) | -3.42(±0.10) | 1.45(±0.00) | -1.98(±0.10) |
|  | <b>R457</b> | -0.02(±0.00) | -35.46(±0.08) | 33.25(±0.07)  | 0.00(±0.00)  | -2.24(±0.00) | 0.13(±0.00) | -2.11(±0.00) |

Delta

|      |              |               |               |              |              |              |              |
|------|--------------|---------------|---------------|--------------|--------------|--------------|--------------|
| K458 | -0.08(±0.01) | -34.34(±0.20) | 32.23(±0.19)  | -0.01(±0.00) | -2.19(±0.02) | 0.60(±0.00)  | -1.59(±0.02) |
| I472 | -0.06(±0.00) | 0.00(±0.01)   | 0.01(±0.01)   | 0.00(±0.00)  | -0.05(±0.00) | 0.00(±0.00)  | -0.05(±0.00) |
| Y473 | -0.98(±0.03) | -0.81(±0.07)  | 1.04(±0.07)   | -0.11(±0.01) | -0.86(±0.03) | 0.45(±0.00)  | -0.42(±0.03) |
| Q474 | -0.10(±0.00) | -0.23(±0.03)  | 0.26(±0.03)   | 0.00(±0.00)  | -0.07(±0.00) | 0.07(±0.00)  | 0.00(±0.00)  |
| S477 | -0.08(±0.02) | 0.00(±0.08)   | 0.02(±0.06)   | -0.02(±0.00) | -0.08(±0.02) | 0.22(±0.00)  | 0.15(±0.02)  |
| K478 | -0.10(±0.01) | -38.36(±0.22) | 36.01(±0.21)  | 0.00(±0.00)  | -2.45(±0.02) | 1.31(±0.00)  | -1.14(±0.02) |
| C480 | -0.03(±0.00) | 0.53(±0.02)   | -0.51(±0.02)  | 0.00(±0.00)  | -0.02(±0.00) | 0.00(±0.00)  | -0.02(±0.00) |
| V483 | -0.02(±0.00) | -0.02(±0.01)  | 0.03(±0.01)   | 0.00(±0.00)  | -0.01(±0.00) | 0.02(±0.00)  | 0.01(±0.00)  |
| E484 | -0.28(±0.02) | 43.06(±0.18)  | -40.22(±0.16) | -0.04(±0.01) | 2.53(±0.02)  | 1.17(±0.00)  | 3.70(±0.02)  |
| F486 | -6.22(±0.12) | -1.46(±0.08)  | 3.30(±0.08)   | -0.89(±0.02) | -5.27(±0.11) | 1.59(±0.00)  | -3.68(±0.11) |
| N487 | -1.63(±0.12) | -1.23(±0.10)  | 1.03(±0.06)   | -0.36(±0.00) | -2.19(±0.10) | 1.70(±0.00)  | -0.49(±0.10) |
| C488 | -0.05(±0.00) | -0.96(±0.02)  | 0.96(±0.02)   | 0.00(±0.00)  | -0.05(±0.00) | 0.00(±0.00)  | -0.05(±0.00) |
| Y489 | -6.20(±0.07) | 0.46(±0.03)   | 0.40(±0.03)   | -0.84(±0.01) | -6.18(±0.07) | 0.70(±0.00)  | -5.48(±0.07) |
| F490 | -0.15(±0.00) | 0.29(±0.01)   | -0.18(±0.01)  | 0.00(±0.00)  | -0.04(±0.00) | -0.01(±0.00) | -0.05(±0.00) |
| P491 | -0.04(±0.00) | 0.41(±0.01)   | -0.40(±0.01)  | 0.00(±0.00)  | -0.02(±0.00) | 0.01(±0.00)  | -0.01(±0.00) |
| L492 | -0.04(±0.00) | 0.36(±0.01)   | -0.36(±0.01)  | 0.00(±0.00)  | -0.04(±0.00) | 0.07(±0.00)  | 0.03(±0.00)  |
| Q493 | -2.86(±0.17) | -10.39(±0.19) | 8.11(±0.12)   | -0.85(±0.01) | -5.99(±0.13) | 2.87(±0.00)  | -3.12(±0.13) |
| S494 | -0.06(±0.00) | 0.24(±0.07)   | -0.21(±0.07)  | 0.00(±0.00)  | -0.04(±0.00) | 0.16(±0.00)  | 0.12(±0.00)  |
| Y495 | -0.27(±0.00) | -0.69(±0.01)  | 0.72(±0.01)   | 0.00(±0.00)  | -0.24(±0.00) | 0.02(±0.00)  | -0.22(±0.00) |
| F497 | -0.24(±0.00) | 0.22(±0.02)   | -0.35(±0.02)  | 0.00(±0.00)  | -0.37(±0.01) | 0.05(±0.00)  | -0.32(±0.01) |
| Q498 | -2.69(±0.17) | -6.18(±0.13)  | 2.82(±0.07)   | -0.57(±0.01) | -6.61(±0.13) | 2.16(±0.00)  | -4.46(±0.13) |
| P499 | -0.23(±0.00) | 0.15(±0.02)   | -0.15(±0.02)  | 0.00(±0.00)  | -0.24(±0.01) | 0.09(±0.00)  | -0.14(±0.01) |
| T500 | -0.63(±0.13) | -3.42(±0.10)  | 3.18(±0.05)   | -0.32(±0.00) | -1.19(±0.10) | 1.53(±0.00)  | 0.35(±0.10)  |
| N501 | -3.05(±0.05) | -2.97(±0.06)  | 2.59(±0.04)   | -0.20(±0.00) | -3.64(±0.05) | 0.64(±0.00)  | -3.00(±0.05) |
| V503 | -0.55(±0.03) | 0.24(±0.01)   | 0.00(±0.02)   | -0.07(±0.01) | -0.38(±0.03) | 0.14(±0.00)  | -0.23(±0.03) |
| Y505 | -5.64(±0.13) | -3.59(±0.20)  | 3.67(±0.16)   | -0.79(±0.02) | -6.35(±0.12) | 1.84(±0.00)  | -4.51(±0.12) |
| Q506 | -0.40(±0.02) | -2.27(±0.03)  | 2.24(±0.02)   | -0.02(±0.00) | -0.45(±0.02) | 0.09(±0.00)  | -0.36(±0.02) |
| P507 | -0.05(±0.00) | 0.05(±0.00)   | -0.08(±0.01)  | 0.00(±0.00)  | -0.08(±0.00) | 0.00(±0.00)  | -0.08(±0.00) |
| Y508 | -0.08(±0.00) | 0.16(±0.05)   | -0.14(±0.04)  | 0.00(±0.00)  | -0.06(±0.00) | 0.09(±0.00)  | 0.03(±0.00)  |

---



**Table S2.** Energy terms of binding free energy of residues within 10 Å from the binding interface of ACE2 obtained by ASIE method (all values are in kcal/mol).

| Systems | Residues     | $\Delta\Delta E_{vdw}$ | $\Delta\Delta E_{ele}$ | $\Delta\Delta G_{gb}$ | $\Delta\Delta G_{np}$ | $\Delta\Delta H$ | $-T\Delta\Delta S$ | $\Delta\Delta G_{bind}$ |
|---------|--------------|------------------------|------------------------|-----------------------|-----------------------|------------------|--------------------|-------------------------|
| WT      | S19          | 0.19(±0.12)            | -0.71(±0.08)           | 0.55(±0.05)           | -0.09(±0.00)          | -0.08(±0.10)     | 0.79(±0.00)        | 0.72(±0.10)             |
|         | T20          | -0.04(±0.00)           | -0.08(±0.01)           | 0.09(±0.01)           | 0.00(±0.00)           | -0.03(±0.00)     | 0.01(±0.00)        | -0.02(±0.00)            |
|         | I21          | -0.19(±0.01)           | -0.08(±0.01)           | 0.07(±0.01)           | 0.00(±0.00)           | -0.20(±0.01)     | 0.01(±0.00)        | -0.19(±0.01)            |
|         | E22          | -0.03(±0.00)           | -6.28(±0.07)           | 5.91(±0.06)           | 0.00(±0.00)           | -0.40(±0.00)     | 0.14(±0.00)        | -0.26(±0.00)            |
|         | E23          | -0.49(±0.03)           | -9.44(±0.19)           | 9.10(±0.18)           | -0.04(±0.01)          | -0.87(±0.03)     | 0.91(±0.00)        | 0.04(±0.03)             |
|         | Q24          | -3.04(±0.09)           | -1.39(±0.08)           | 1.23(±0.05)           | -0.43(±0.01)          | -3.62(±0.08)     | 1.13(±0.00)        | -2.50(±0.08)            |
|         | K26          | -0.24(±0.02)           | 10.33(±0.25)           | -9.62(±0.23)          | -0.01(±0.00)          | 0.46(±0.01)      | 0.86(±0.00)        | 1.32(±0.01)             |
|         | T27          | -2.26(±0.06)           | -0.76(±0.03)           | 1.05(±0.03)           | -0.41(±0.00)          | -2.38(±0.07)     | 0.84(±0.00)        | -1.54(±0.07)            |
|         | F28          | -0.96(±0.03)           | -0.64(±0.03)           | 0.84(±0.02)           | -0.05(±0.00)          | -0.81(±0.03)     | 0.06(±0.00)        | -0.76(±0.03)            |
|         | L29          | -0.08(±0.00)           | -0.19(±0.01)           | 0.20(±0.01)           | 0.00(±0.00)           | -0.07(±0.00)     | 0.01(±0.00)        | -0.06(±0.00)            |
|         | D30          | 0.17(±0.13)            | -19.78(±0.30)          | 17.87(±0.24)          | -0.32(±0.01)          | -2.05(±0.09)     | 2.83(±0.00)        | 0.78(±0.09)             |
|         | K31          | -2.79(±0.13)           | 0.21(±0.22)            | -0.82(±0.21)          | -0.59(±0.01)          | -4.00(±0.11)     | 2.81(±0.00)        | -1.19(±0.11)            |
|         | F32          | -0.10(±0.00)           | -0.17(±0.01)           | 0.19(±0.01)           | 0.00(±0.00)           | -0.08(±0.00)     | 0.01(±0.00)        | -0.07(±0.00)            |
|         | N33          | -0.07(±0.00)           | 0.53(±0.02)            | -0.50(±0.02)          | 0.00(±0.00)           | -0.05(±0.00)     | 0.03(±0.00)        | -0.01(±0.00)            |
|         | H34          | -5.17(±0.14)           | -2.66(±0.13)           | 3.12(±0.10)           | -0.82(±0.01)          | -5.54(±0.13)     | 1.84(±0.00)        | -3.70(±0.13)            |
|         | E35          | -0.69(±0.12)           | -7.58(±0.19)           | 6.79(±0.16)           | -0.19(±0.00)          | -1.67(±0.09)     | 2.10(±0.00)        | 0.43(±0.09)             |
|         | E37          | -0.76(±0.11)           | -14.70(±0.22)          | 13.62(±0.18)          | -0.28(±0.01)          | -2.12(±0.09)     | 2.11(±0.00)        | -0.01(±0.09)            |
|         | D38          | -1.11(±0.16)           | -13.83(±0.16)          | 12.35(±0.13)          | -0.49(±0.01)          | -3.08(±0.13)     | 2.49(±0.00)        | -0.59(±0.13)            |
|         | L39          | -0.15(±0.00)           | -0.21(±0.01)           | 0.21(±0.01)           | 0.00(±0.00)           | -0.14(±0.01)     | 0.01(±0.00)        | -0.13(±0.01)            |
|         | F40          | -0.07(±0.00)           | -0.09(±0.00)           | 0.12(±0.00)           | 0.00(±0.00)           | -0.04(±0.00)     | 0.00(±0.00)        | -0.04(±0.00)            |
|         | Y41          | -4.90(±0.10)           | 0.09(±0.09)            | 0.17(±0.06)           | -0.50(±0.01)          | -5.15(±0.11)     | 1.20(±0.00)        | -3.95(±0.11)            |
|         | Q42          | -1.64(±0.10)           | -0.40(±0.12)           | 0.45(±0.10)           | -0.32(±0.02)          | -1.90(±0.11)     | 0.81(±0.00)        | -1.09(±0.11)            |
|         | S43          | -0.01(±0.00)           | 0.08(±0.01)            | -0.06(±0.01)          | 0.00(±0.00)           | 0.01(±0.00)      | 0.01(±0.00)        | 0.01(±0.00)             |
|         | S44          | -0.01(±0.00)           | 0.22(±0.01)            | -0.20(±0.01)          | 0.00(±0.00)           | 0.01(±0.00)      | 0.00(±0.00)        | 0.02(±0.00)             |
|         | L45          | -1.00(±0.03)           | 0.27(±0.01)            | -0.18(±0.01)          | -0.08(±0.00)          | -0.98(±0.03)     | 0.07(±0.00)        | -0.91(±0.03)            |
|         | W48          | -0.12(±0.00)           | 0.17(±0.02)            | -0.15(±0.02)          | 0.00(±0.00)           | -0.10(±0.00)     | 0.02(±0.00)        | -0.08(±0.00)            |
|         | N49          | -0.06(±0.00)           | 0.09(±0.02)            | -0.04(±0.02)          | 0.00(±0.00)           | -0.02(±0.00)     | 0.03(±0.00)        | 0.01(±0.00)             |
|         | T52          | -0.01(±0.00)           | -0.09(±0.00)           | 0.09(±0.00)           | 0.00(±0.00)           | -0.01(±0.00)     | 0.00(±0.00)        | -0.01(±0.00)            |
|         | N61          | -0.03(±0.00)           | -0.08(±0.02)           | 0.11(±0.02)           | 0.00(±0.00)           | 0.00(±0.00)      | 0.04(±0.00)        | 0.03(±0.00)             |
|         | K68          | -0.08(±0.01)           | 5.94(±0.09)            | -5.52(±0.08)          | 0.00(±0.00)           | 0.33(±0.01)      | 0.27(±0.00)        | 0.60(±0.01)             |
|         | W69          | -0.06(±0.00)           | -0.30(±0.01)           | 0.34(±0.01)           | 0.00(±0.00)           | -0.03(±0.00)     | 0.01(±0.00)        | -0.01(±0.00)            |
|         | F72          | -0.14(±0.00)           | -0.19(±0.01)           | 0.23(±0.01)           | 0.00(±0.00)           | -0.10(±0.00)     | 0.00(±0.00)        | -0.09(±0.00)            |
|         | E75          | -0.13(±0.01)           | -2.81(±0.09)           | 2.73(±0.08)           | 0.00(±0.00)           | -0.20(±0.01)     | 0.29(±0.00)        | 0.09(±0.01)             |
|         | Q76          | -0.21(±0.01)           | -0.56(±0.03)           | 0.66(±0.03)           | 0.00(±0.00)           | -0.11(±0.00)     | 0.09(±0.00)        | -0.02(±0.00)            |
|         | S77          | 0.00(±0.00)            | 0.05(±0.00)            | -0.05(±0.00)          | 0.00(±0.00)           | 0.00(±0.00)      | 0.00(±0.00)        | 0.00(±0.00)             |
|         | T78          | -0.04(±0.00)           | 0.07(±0.00)            | -0.06(±0.00)          | 0.00(±0.00)           | -0.03(±0.00)     | 0.01(±0.00)        | -0.02(±0.00)            |
|         | L79          | -1.63(±0.06)           | -0.07(±0.01)           | 0.43(±0.02)           | -0.23(±0.01)          | -1.50(±0.06)     | 0.40(±0.00)        | -1.10(±0.06)            |
|         | Q81          | -0.02(±0.00)           | 0.01(±0.01)            | 0.00(±0.01)           | 0.00(±0.00)           | -0.01(±0.00)     | 0.00(±0.00)        | -0.01(±0.00)            |
|         | M82          | -1.86(±0.07)           | -0.03(±0.05)           | 0.52(±0.05)           | -0.30(±0.01)          | -1.68(±0.07)     | 0.59(±0.00)        | -1.08(±0.07)            |
|         | Y83          | -2.39(±0.11)           | -2.20(±0.08)           | 2.21(±0.05)           | -0.48(±0.01)          | -2.86(±0.10)     | 1.50(±0.00)        | -1.37(±0.10)            |
| P84     | -0.05(±0.00) | -0.01(±0.00)           | 0.00(±0.00)            | 0.00(±0.00)           | -0.06(±0.00)          | 0.00(±0.00)      | -0.05(±0.00)       |                         |
| E87     | -0.02(±0.00) | -4.87(±0.04)           | 4.58(±0.04)            | 0.00(±0.00)           | -0.30(±0.00)          | 0.08(±0.00)      | -0.23(±0.00)       |                         |
| I88     | -0.03(±0.00) | 0.05(±0.00)            | -0.04(±0.00)           | 0.00(±0.00)           | -0.03(±0.00)          | 0.00(±0.00)      | -0.03(±0.00)       |                         |
| L97     | -0.06(±0.00) | 0.01(±0.00)            | 0.01(±0.00)            | 0.00(±0.00)           | -0.04(±0.00)          | 0.00(±0.00)      | -0.04(±0.00)       |                         |

|       |              |               |               |              |              |              |              |              |
|-------|--------------|---------------|---------------|--------------|--------------|--------------|--------------|--------------|
| L100  | -0.04(±0.00) | 0.11(±0.00)   | -0.09(±0.00)  | 0.00(±0.00)  | -0.02(±0.00) | 0.00(±0.00)  | -0.02(±0.00) |              |
| Q101  | -0.02(±0.00) | 0.19(±0.01)   | -0.18(±0.01)  | 0.00(±0.00)  | -0.01(±0.00) | 0.00(±0.00)  | -0.01(±0.00) |              |
| M323  | -0.02(±0.00) | 0.19(±0.02)   | -0.19(±0.02)  | 0.00(±0.00)  | -0.01(±0.00) | 0.02(±0.00)  | 0.01(±0.00)  |              |
| T324  | -0.23(±0.01) | 0.18(±0.03)   | -0.11(±0.03)  | -0.02(±0.00) | -0.18(±0.02) | 0.06(±0.00)  | -0.13(±0.02) |              |
| Q325  | -0.24(±0.03) | -0.09(±0.04)  | 0.20(±0.04)   | -0.03(±0.01) | -0.15(±0.02) | 0.12(±0.00)  | -0.03(±0.02) |              |
| F327  | -0.05(±0.00) | -0.04(±0.00)  | 0.04(±0.00)   | 0.00(±0.00)  | -0.04(±0.00) | 0.00(±0.00)  | -0.04(±0.00) |              |
| W328  | -0.03(±0.00) | 0.11(±0.01)   | -0.09(±0.01)  | 0.00(±0.00)  | -0.01(±0.00) | 0.02(±0.00)  | 0.00(±0.00)  |              |
| E329  | -0.10(±0.01) | -6.63(±0.06)  | 6.28(±0.06)   | 0.00(±0.00)  | -0.45(±0.01) | 0.16(±0.00)  | -0.29(±0.01) |              |
| N330  | -1.33(±0.04) | -0.19(±0.03)  | 0.51(±0.03)   | -0.20(±0.00) | -1.21(±0.04) | 0.29(±0.00)  | -0.92(±0.04) |              |
| S331  | -0.01(±0.00) | -0.01(±0.00)  | 0.01(±0.00)   | 0.00(±0.00)  | -0.01(±0.00) | 0.00(±0.00)  | -0.01(±0.00) |              |
| W349  | -0.03(±0.00) | -0.52(±0.01)  | 0.53(±0.01)   | 0.00(±0.00)  | -0.03(±0.00) | 0.00(±0.00)  | -0.02(±0.00) |              |
| D350  | -0.03(±0.00) | -7.28(±0.07)  | 6.86(±0.06)   | 0.00(±0.00)  | -0.45(±0.00) | 0.09(±0.00)  | -0.36(±0.00) |              |
| L351  | -0.24(±0.01) | 0.03(±0.01)   | -0.22(±0.01)  | 0.00(±0.00)  | -0.42(±0.01) | 0.00(±0.00)  | -0.41(±0.01) |              |
| K353  | -3.76(±0.15) | 8.32(±0.17)   | -8.95(±0.14)  | -0.55(±0.01) | -4.94(±0.13) | 1.89(±0.00)  | -3.05(±0.13) |              |
| D355  | -0.60(±0.14) | -12.02(±0.13) | 10.68(±0.09)  | -0.09(±0.00) | -2.03(±0.11) | 2.06(±0.00)  | 0.03(±0.11)  |              |
| F356  | -0.32(±0.01) | 0.05(±0.02)   | -0.02(±0.02)  | 0.00(±0.00)  | -0.30(±0.01) | 0.02(±0.00)  | -0.28(±0.01) |              |
| R357  | -1.31(±0.03) | 9.04(±0.08)   | -8.75(±0.07)  | -0.10(±0.00) | -1.12(±0.03) | 0.42(±0.00)  | -0.70(±0.03) |              |
| D382  | -0.02(±0.00) | -6.85(±0.05)  | 6.45(±0.05)   | 0.00(±0.00)  | -0.42(±0.00) | 0.10(±0.00)  | -0.32(±0.00) |              |
| M383  | -0.06(±0.00) | -0.10(±0.05)  | 0.13(±0.05)   | 0.00(±0.00)  | -0.04(±0.00) | 0.08(±0.00)  | 0.05(±0.00)  |              |
| Y385  | -0.04(±0.00) | 0.10(±0.01)   | -0.10(±0.01)  | 0.00(±0.00)  | -0.03(±0.00) | 0.00(±0.00)  | -0.03(±0.00) |              |
| Q388  | -0.04(±0.00) | -0.30(±0.02)  | 0.32(±0.02)   | 0.00(±0.00)  | -0.02(±0.00) | 0.02(±0.00)  | 0.00(±0.00)  |              |
| P389  | -0.06(±0.00) | 0.02(±0.01)   | 0.00(±0.01)   | 0.00(±0.00)  | -0.04(±0.00) | 0.01(±0.00)  | -0.03(±0.00) |              |
| F390  | -0.12(±0.00) | -0.07(±0.01)  | 0.08(±0.01)   | 0.00(±0.00)  | -0.10(±0.00) | 0.00(±0.00)  | -0.10(±0.00) |              |
| R393  | -1.09(±0.04) | 10.30(±0.10)  | -9.82(±0.09)  | -0.16(±0.01) | -0.76(±0.04) | 0.60(±0.00)  | -0.17(±0.04) |              |
| S19   | 0.27(±0.08)  | -0.67(±0.05)  | 0.51(±0.03)   | -0.07(±0.00) | 0.04(±0.07)  | 0.61(±0.00)  | 0.65(±0.07)  |              |
| T20   | -0.32(±0.03) | -0.38(±0.03)  | 0.28(±0.02)   | -0.05(±0.00) | -0.47(±0.03) | 0.15(±0.00)  | -0.32(±0.03) |              |
| I21   | -0.23(±0.01) | -0.10(±0.01)  | 0.11(±0.01)   | -0.01(±0.00) | -0.23(±0.01) | 0.01(±0.00)  | -0.22(±0.01) |              |
| E22   | -0.03(±0.00) | -8.29(±0.09)  | 7.79(±0.08)   | 0.00(±0.00)  | -0.53(±0.01) | 0.13(±0.00)  | -0.40(±0.01) |              |
| E23   | -0.36(±0.02) | -11.10(±0.20) | 10.59(±0.19)  | -0.02(±0.00) | -0.89(±0.02) | 0.68(±0.00)  | -0.22(±0.02) |              |
| Q24   | -3.65(±0.12) | -2.17(±0.14)  | 1.79(±0.10)   | -0.51(±0.01) | -4.55(±0.13) | 1.43(±0.00)  | -3.12(±0.13) |              |
| K26   | -0.20(±0.01) | 12.17(±0.25)  | -11.35(±0.23) | -0.01(±0.00) | 0.61(±0.01)  | 0.87(±0.00)  | 1.48(±0.01)  |              |
| T27   | -2.30(±0.07) | -0.69(±0.03)  | 0.98(±0.03)   | -0.40(±0.00) | -2.41(±0.07) | 0.79(±0.00)  | -1.62(±0.07) |              |
| F28   | -1.07(±0.03) | -0.66(±0.03)  | 0.89(±0.02)   | -0.05(±0.00) | -0.90(±0.03) | 0.08(±0.00)  | -0.82(±0.03) |              |
| L29   | -0.08(±0.00) | -0.27(±0.01)  | 0.28(±0.01)   | 0.00(±0.00)  | -0.07(±0.00) | 0.01(±0.00)  | -0.06(±0.00) |              |
| D30   | -0.21(±0.11) | -22.11(±0.37) | 20.25(±0.31)  | -0.31(±0.02) | -2.37(±0.10) | 2.57(±0.00)  | 0.20(±0.10)  |              |
| K31   | -2.96(±0.12) | 6.16(±0.26)   | -6.30(±0.23)  | -0.60(±0.01) | -3.71(±0.11) | 2.89(±0.00)  | -0.82(±0.11) |              |
| L452R | F32          | -0.10(±0.00)  | -0.22(±0.01)  | 0.25(±0.01)  | 0.00(±0.00)  | -0.08(±0.00) | 0.01(±0.00)  | -0.06(±0.00) |
| N33   | -0.08(±0.00) | 0.56(±0.03)   | -0.53(±0.03)  | 0.00(±0.00)  | -0.05(±0.00) | 0.05(±0.00)  | 0.00(±0.00)  |              |
| H34   | -3.86(±0.10) | -1.08(±0.14)  | 1.83(±0.11)   | -0.60(±0.01) | -3.70(±0.11) | 1.26(±0.00)  | -2.44(±0.11) |              |
| E35   | -0.42(±0.11) | -13.40(±0.19) | 12.17(±0.17)  | -0.18(±0.00) | -1.83(±0.08) | 2.30(±0.00)  | 0.47(±0.08)  |              |
| E37   | -0.70(±0.12) | -18.31(±0.28) | 17.09(±0.24)  | -0.27(±0.01) | -2.20(±0.10) | 2.18(±0.00)  | -0.01(±0.10) |              |
| D38   | -1.33(±0.15) | -18.95(±0.16) | 16.76(±0.13)  | -0.46(±0.01) | -3.97(±0.13) | 2.65(±0.00)  | -1.33(±0.13) |              |
| L39   | -0.14(±0.00) | -0.20(±0.01)  | 0.21(±0.01)   | 0.00(±0.00)  | -0.14(±0.01) | 0.01(±0.00)  | -0.12(±0.01) |              |
| F40   | -0.07(±0.00) | -0.13(±0.00)  | 0.16(±0.00)   | 0.00(±0.00)  | -0.04(±0.00) | 0.00(±0.00)  | -0.04(±0.00) |              |
| Y41   | -5.42(±0.10) | -0.32(±0.09)  | 0.36(±0.05)   | -0.50(±0.01) | -5.88(±0.09) | 1.36(±0.00)  | -4.51(±0.09) |              |
| Q42   | -1.31(±0.08) | -0.15(±0.10)  | 0.27(±0.09)   | -0.22(±0.02) | -1.41(±0.10) | 0.58(±0.00)  | -0.82(±0.10) |              |
| S43   | -0.01(±0.00) | 0.11(±0.01)   | -0.09(±0.01)  | 0.00(±0.00)  | 0.01(±0.00)  | 0.01(±0.00)  | 0.02(±0.00)  |              |
| S44   | -0.01(±0.00) | 0.31(±0.01)   | -0.29(±0.01)  | 0.00(±0.00)  | 0.01(±0.00)  | 0.01(±0.00)  | 0.02(±0.00)  |              |
| L45   | -0.94(±0.03) | 0.34(±0.01)   | -0.27(±0.01)  | -0.07(±0.00) | -0.94(±0.04) | 0.06(±0.00)  | -0.89(±0.04) |              |

|      |              |               |               |              |              |             |              |
|------|--------------|---------------|---------------|--------------|--------------|-------------|--------------|
| W48  | -0.12(±0.00) | 0.16(±0.02)   | -0.15(±0.02)  | 0.00(±0.00)  | -0.11(±0.00) | 0.03(±0.00) | -0.08(±0.00) |
| N49  | -0.06(±0.00) | 0.17(±0.02)   | -0.12(±0.02)  | 0.00(±0.00)  | -0.01(±0.00) | 0.03(±0.00) | 0.02(±0.00)  |
| T52  | -0.01(±0.00) | -0.11(±0.00)  | 0.11(±0.00)   | 0.00(±0.00)  | -0.01(±0.00) | 0.00(±0.00) | -0.01(±0.00) |
| N61  | -0.03(±0.00) | -0.16(±0.03)  | 0.18(±0.03)   | 0.00(±0.00)  | -0.01(±0.00) | 0.05(±0.00) | 0.04(±0.00)  |
| K68  | -0.07(±0.00) | 9.83(±0.11)   | -9.17(±0.10)  | 0.00(±0.00)  | 0.59(±0.01)  | 0.32(±0.00) | 0.91(±0.01)  |
| W69  | -0.06(±0.00) | -0.57(±0.01)  | 0.60(±0.01)   | 0.00(±0.00)  | -0.03(±0.00) | 0.01(±0.00) | -0.02(±0.00) |
| F72  | -0.13(±0.00) | -0.14(±0.01)  | 0.18(±0.01)   | 0.00(±0.00)  | -0.08(±0.00) | 0.01(±0.00) | -0.07(±0.00) |
| E75  | -0.11(±0.01) | -6.04(±0.10)  | 5.76(±0.10)   | 0.00(±0.00)  | -0.40(±0.01) | 0.31(±0.00) | -0.08(±0.01) |
| Q76  | -0.19(±0.00) | -0.44(±0.03)  | 0.54(±0.03)   | 0.00(±0.00)  | -0.09(±0.00) | 0.08(±0.00) | -0.01(±0.00) |
| S77  | 0.00(±0.00)  | 0.15(±0.00)   | -0.14(±0.00)  | 0.00(±0.00)  | 0.00(±0.00)  | 0.00(±0.00) | 0.00(±0.00)  |
| T78  | -0.02(±0.00) | 0.12(±0.00)   | -0.11(±0.00)  | 0.00(±0.00)  | -0.01(±0.00) | 0.00(±0.00) | -0.01(±0.00) |
| L79  | -1.44(±0.06) | -0.02(±0.01)  | 0.34(±0.01)   | -0.19(±0.01) | -1.30(±0.06) | 0.30(±0.00) | -1.00(±0.06) |
| Q81  | -0.02(±0.00) | 0.10(±0.01)   | -0.09(±0.01)  | 0.00(±0.00)  | -0.01(±0.00) | 0.01(±0.00) | 0.00(±0.00)  |
| M82  | -1.64(±0.06) | -0.07(±0.05)  | 0.53(±0.05)   | -0.25(±0.01) | -1.44(±0.07) | 0.45(±0.00) | -0.98(±0.07) |
| Y83  | -2.37(±0.14) | -2.46(±0.07)  | 2.41(±0.04)   | -0.53(±0.01) | -2.96(±0.11) | 1.62(±0.00) | -1.34(±0.11) |
| P84  | -0.05(±0.00) | -0.01(±0.00)  | 0.00(±0.00)   | 0.00(±0.00)  | -0.06(±0.00) | 0.00(±0.00) | -0.06(±0.00) |
| E87  | -0.02(±0.00) | -6.72(±0.06)  | 6.31(±0.06)   | 0.00(±0.00)  | -0.42(±0.00) | 0.09(±0.00) | -0.33(±0.00) |
| I88  | -0.03(±0.00) | 0.06(±0.00)   | -0.06(±0.00)  | 0.00(±0.00)  | -0.03(±0.00) | 0.00(±0.00) | -0.03(±0.00) |
| L97  | -0.06(±0.00) | -0.04(±0.00)  | 0.05(±0.00)   | 0.00(±0.00)  | -0.04(±0.00) | 0.00(±0.00) | -0.04(±0.00) |
| L100 | -0.04(±0.00) | 0.13(±0.00)   | -0.12(±0.00)  | 0.00(±0.00)  | -0.02(±0.00) | 0.00(±0.00) | -0.02(±0.00) |
| Q101 | -0.02(±0.00) | 0.26(±0.01)   | -0.25(±0.01)  | 0.00(±0.00)  | -0.01(±0.00) | 0.00(±0.00) | -0.01(±0.00) |
| M323 | -0.02(±0.00) | 0.15(±0.03)   | -0.15(±0.03)  | 0.00(±0.00)  | -0.02(±0.00) | 0.04(±0.00) | 0.02(±0.00)  |
| T324 | -0.21(±0.01) | 0.31(±0.03)   | -0.26(±0.03)  | -0.01(±0.00) | -0.17(±0.01) | 0.04(±0.00) | -0.13(±0.01) |
| Q325 | -0.50(±0.06) | -0.17(±0.07)  | 0.35(±0.07)   | -0.07(±0.01) | -0.39(±0.06) | 0.29(±0.00) | -0.10(±0.06) |
| F327 | -0.04(±0.00) | -0.05(±0.00)  | 0.05(±0.00)   | 0.00(±0.00)  | -0.04(±0.00) | 0.00(±0.00) | -0.05(±0.00) |
| W328 | -0.03(±0.00) | 0.14(±0.02)   | -0.13(±0.02)  | 0.00(±0.00)  | -0.02(±0.00) | 0.02(±0.00) | 0.01(±0.00)  |
| E329 | -0.15(±0.01) | -9.14(±0.09)  | 8.67(±0.09)   | 0.00(±0.00)  | -0.63(±0.01) | 0.22(±0.00) | -0.40(±0.01) |
| N330 | -1.44(±0.04) | -0.24(±0.03)  | 0.53(±0.03)   | -0.21(±0.00) | -1.36(±0.04) | 0.33(±0.00) | -1.03(±0.04) |
| S331 | -0.01(±0.00) | -0.03(±0.01)  | 0.02(±0.01)   | 0.00(±0.00)  | -0.01(±0.00) | 0.00(±0.00) | -0.01(±0.00) |
| W349 | -0.04(±0.00) | -0.70(±0.01)  | 0.71(±0.01)   | 0.00(±0.00)  | -0.03(±0.00) | 0.00(±0.00) | -0.02(±0.00) |
| D350 | -0.03(±0.00) | -10.10(±0.08) | 9.50(±0.07)   | 0.00(±0.00)  | -0.63(±0.01) | 0.11(±0.00) | -0.53(±0.01) |
| L351 | -0.26(±0.01) | 0.04(±0.01)   | -0.24(±0.01)  | 0.00(±0.00)  | -0.45(±0.01) | 0.01(±0.00) | -0.44(±0.01) |
| K353 | -3.45(±0.16) | 10.58(±0.16)  | -11.84(±0.13) | -0.56(±0.01) | -5.27(±0.14) | 2.35(±0.00) | -2.92(±0.14) |
| D355 | -0.81(±0.12) | -14.99(±0.13) | 13.50(±0.09)  | -0.06(±0.00) | -2.37(±0.09) | 1.99(±0.00) | -0.38(±0.09) |
| F356 | -0.31(±0.01) | 0.06(±0.02)   | -0.05(±0.02)  | 0.00(±0.00)  | -0.30(±0.01) | 0.02(±0.00) | -0.28(±0.01) |
| R357 | -1.25(±0.03) | 11.72(±0.07)  | -11.26(±0.07) | -0.10(±0.00) | -0.89(±0.03) | 0.46(±0.00) | -0.43(±0.03) |
| D382 | -0.01(±0.00) | -8.87(±0.05)  | 8.33(±0.05)   | 0.00(±0.00)  | -0.55(±0.00) | 0.08(±0.00) | -0.47(±0.00) |
| M383 | -0.05(±0.00) | -0.11(±0.05)  | 0.12(±0.05)   | 0.00(±0.00)  | -0.04(±0.00) | 0.09(±0.00) | 0.05(±0.00)  |
| Y385 | -0.03(±0.00) | 0.11(±0.01)   | -0.11(±0.01)  | 0.00(±0.00)  | -0.03(±0.00) | 0.00(±0.00) | -0.02(±0.00) |
| Q388 | -0.03(±0.00) | -0.36(±0.02)  | 0.37(±0.02)   | 0.00(±0.00)  | -0.02(±0.00) | 0.02(±0.00) | 0.00(±0.00)  |
| P389 | -0.05(±0.00) | -0.04(±0.01)  | 0.05(±0.01)   | 0.00(±0.00)  | -0.04(±0.00) | 0.01(±0.00) | -0.03(±0.00) |
| F390 | -0.11(±0.00) | -0.10(±0.01)  | 0.11(±0.01)   | 0.00(±0.00)  | -0.10(±0.01) | 0.00(±0.00) | -0.10(±0.01) |
| R393 | -0.91(±0.04) | 13.39(±0.11)  | -12.71(±0.10) | -0.13(±0.00) | -0.36(±0.04) | 0.54(±0.00) | 0.18(±0.04)  |
| S19  | 0.11(±0.10)  | -0.68(±0.07)  | 0.49(±0.05)   | -0.10(±0.00) | -0.19(±0.09) | 0.77(±0.00) | 0.58(±0.09)  |
| T20  | -0.04(±0.00) | -0.07(±0.02)  | 0.08(±0.02)   | 0.00(±0.00)  | -0.03(±0.00) | 0.02(±0.00) | 0.00(±0.00)  |
| I21  | -0.20(±0.01) | -0.09(±0.01)  | 0.07(±0.01)   | 0.00(±0.00)  | -0.22(±0.01) | 0(±0.00)    | -0.21(±0.01) |
| E22  | -0.03(±0.00) | -9.16(±0.06)  | 8.61(±0.06)   | 0.00(±0.00)  | -0.58(±0.00) | 0.14(±0.00) | -0.44(±0.00) |
| E23  | -0.41(±0.02) | -12.27(±0.16) | 11.72(±0.15)  | -0.03(±0.00) | -1.00(±0.02) | 0.8(±0.00)  | -0.20(±0.02) |
| Q24  | -3.08(±0.10) | -1.69(±0.10)  | 1.48(±0.07)   | -0.43(±0.01) | -3.71(±0.08) | 1.14(±0.00) | -2.57(±0.08) |

|      |              |               |               |              |              |             |              |
|------|--------------|---------------|---------------|--------------|--------------|-------------|--------------|
| K26  | -0.22(±0.01) | 12.86(±0.20)  | -11.99(±0.19) | -0.01(±0.00) | 0.64(±0.01)  | 0.84(±0.00) | 1.47(±0.01)  |
| T27  | -2.13(±0.07) | -0.60(±0.03)  | 0.89(±0.03)   | -0.40(±0.00) | -2.24(±0.07) | 0.83(±0.00) | -1.41(±0.07) |
| F28  | -1.12(±0.04) | -0.69(±0.03)  | 0.93(±0.03)   | -0.07(±0.00) | -0.94(±0.04) | 0.11(±0.00) | -0.83(±0.04) |
| L29  | -0.08(±0.00) | -0.19(±0.01)  | 0.20(±0.01)   | 0.00(±0.00)  | -0.06(±0.00) | 0.01(±0.00) | -0.06(±0.00) |
| D30  | -0.19(±0.10) | -19.22(±0.38) | 17.79(±0.32)  | -0.20(±0.02) | -1.82(±0.09) | 2.19(±0.00) | 0.38(±0.09)  |
| K31  | -3.33(±0.12) | 4.67(±0.31)   | -4.76(±0.27)  | -0.62(±0.01) | -4.03(±0.11) | 2.56(±0.00) | -1.47(±0.11) |
| F32  | -0.10(±0.00) | -0.20(±0.01)  | 0.22(±0.01)   | 0.00(±0.00)  | -0.08(±0.00) | 0.01(±0.00) | -0.07(±0.00) |
| N33  | -0.07(±0.00) | 0.54(±0.02)   | -0.52(±0.02)  | 0.00(±0.00)  | -0.04(±0.00) | 0.04(±0.00) | -0.01(±0.00) |
| H34  | -4.48(±0.13) | -2.73(±0.15)  | 3.12(±0.12)   | -0.67(±0.01) | -4.76(±0.14) | 1.51(±0.00) | -3.25(±0.14) |
| E35  | -0.88(±0.12) | -10.60(±0.19) | 9.68(±0.17)   | -0.22(±0.01) | -2.02(±0.10) | 2.03(±0.00) | 0.02(±0.10)  |
| E37  | -0.58(±0.12) | -17.17(±0.25) | 15.96(±0.22)  | -0.26(±0.01) | -2.05(±0.10) | 2.32(±0.00) | 0.27(±0.10)  |
| D38  | -0.75(±0.16) | -15.15(±0.26) | 13.34(±0.19)  | -0.42(±0.01) | -2.99(±0.14) | 2.6(±0.00)  | -0.39(±0.14) |
| L39  | -0.15(±0.00) | -0.15(±0.01)  | 0.14(±0.01)   | 0.00(±0.00)  | -0.16(±0.01) | 0.01(±0.00) | -0.15(±0.01) |
| F40  | -0.07(±0.00) | -0.10(±0.00)  | 0.13(±0.00)   | 0.00(±0.00)  | -0.04(±0.00) | 0(±0.00)    | -0.04(±0.00) |
| Y41  | -5.10(±0.12) | -0.29(±0.12)  | 0.40(±0.07)   | -0.49(±0.01) | -5.48(±0.13) | 1.45(±0.00) | -4.02(±0.13) |
| Q42  | -1.63(±0.09) | 0.30(±0.13)   | -0.23(±0.10)  | -0.28(±0.02) | -1.85(±0.11) | 0.69(±0.00) | -1.15(±0.11) |
| S43  | -0.01(±0.00) | 0.08(±0.01)   | -0.07(±0.01)  | 0.00(±0.00)  | 0.01(±0.00)  | 0(±0.00)    | 0.01(±0.00)  |
| S44  | -0.01(±0.00) | 0.21(±0.01)   | -0.19(±0.01)  | 0.00(±0.00)  | 0.01(±0.00)  | 0(±0.00)    | 0.01(±0.00)  |
| L45  | -1.12(±0.04) | 0.28(±0.01)   | -0.17(±0.02)  | -0.11(±0.01) | -1.11(±0.04) | 0.08(±0.00) | -1.04(±0.04) |
| W48  | -0.12(±0.00) | 0.14(±0.02)   | -0.13(±0.02)  | 0.00(±0.00)  | -0.10(±0.00) | 0.02(±0.00) | -0.08(±0.00) |
| N49  | -0.06(±0.00) | 0.11(±0.02)   | -0.06(±0.02)  | 0.00(±0.00)  | -0.01(±0.00) | 0.03(±0.00) | 0.01(±0.00)  |
| T52  | -0.01(±0.00) | -0.08(±0.00)  | 0.08(±0.00)   | 0.00(±0.00)  | -0.01(±0.00) | 0(±0.00)    | -0.01(±0.00) |
| N61  | -0.03(±0.00) | -0.11(±0.02)  | 0.13(±0.02)   | 0.00(±0.00)  | 0.00(±0.00)  | 0.04(±0.00) | 0.03(±0.00)  |
| K68  | -0.11(±0.01) | 8.13(±0.10)   | -7.58(±0.09)  | 0.00(±0.00)  | 0.44(±0.01)  | 0.26(±0.00) | 0.70(±0.01)  |
| W69  | -0.06(±0.00) | -0.10(±0.02)  | 0.14(±0.02)   | 0.00(±0.00)  | -0.02(±0.00) | 0.01(±0.00) | 0.00(±0.00)  |
| F72  | -0.15(±0.00) | -0.18(±0.01)  | 0.22(±0.01)   | 0.00(±0.00)  | -0.10(±0.00) | 0.01(±0.00) | -0.10(±0.00) |
| E75  | -0.11(±0.01) | -6.64(±0.09)  | 6.31(±0.08)   | 0.00(±0.00)  | -0.43(±0.01) | 0.35(±0.00) | -0.08(±0.01) |
| Q76  | -0.23(±0.01) | -0.56(±0.03)  | 0.66(±0.03)   | 0.00(±0.00)  | -0.12(±0.00) | 0.08(±0.00) | -0.04(±0.00) |
| S77  | 0.00(±0.00)  | 0.09(±0.00)   | -0.09(±0.00)  | 0.00(±0.00)  | 0.00(±0.00)  | 0(±0.00)    | 0.00(±0.00)  |
| T78  | -0.02(±0.00) | 0.10(±0.01)   | -0.09(±0.01)  | 0.00(±0.00)  | -0.01(±0.00) | 0(±0.00)    | -0.01(±0.00) |
| L79  | -1.67(±0.06) | -0.04(±0.01)  | 0.39(±0.01)   | -0.22(±0.01) | -1.54(±0.06) | 0.37(±0.00) | -1.16(±0.06) |
| Q81  | -0.02(±0.00) | -0.04(±0.01)  | 0.05(±0.01)   | 0.00(±0.00)  | -0.01(±0.00) | 0.01(±0.00) | 0.00(±0.00)  |
| M82  | -1.73(±0.06) | -0.08(±0.08)  | 0.52(±0.09)   | -0.25(±0.01) | -1.55(±0.07) | 0.64(±0.00) | -0.91(±0.07) |
| Y83  | -2.61(±0.12) | -2.10(±0.07)  | 2.15(±0.04)   | -0.53(±0.01) | -3.09(±0.11) | 1.55(±0.00) | -1.53(±0.11) |
| P84  | -0.06(±0.00) | 0.06(±0.00)   | -0.07(±0.00)  | 0.00(±0.00)  | -0.07(±0.00) | 0(±0.00)    | -0.06(±0.00) |
| E87  | -0.02(±0.00) | -8.42(±0.06)  | 7.91(±0.06)   | 0.00(±0.00)  | -0.53(±0.00) | 0.16(±0.00) | -0.37(±0.00) |
| I88  | -0.03(±0.00) | 0.05(±0.00)   | -0.05(±0.00)  | 0.00(±0.00)  | -0.03(±0.00) | 0(±0.00)    | -0.03(±0.00) |
| L97  | -0.06(±0.00) | 0.05(±0.00)   | -0.03(±0.00)  | 0.00(±0.00)  | -0.04(±0.00) | 0(±0.00)    | -0.04(±0.00) |
| L100 | -0.04(±0.00) | 0.12(±0.00)   | -0.10(±0.00)  | 0.00(±0.00)  | -0.03(±0.00) | 0(±0.00)    | -0.02(±0.00) |
| Q101 | -0.03(±0.00) | 0.40(±0.01)   | -0.39(±0.01)  | 0.00(±0.00)  | -0.01(±0.00) | 0(±0.00)    | -0.01(±0.00) |
| M323 | -0.02(±0.00) | -0.04(±0.04)  | 0.04(±0.04)   | 0.00(±0.00)  | -0.02(±0.00) | 0.03(±0.00) | 0.01(±0.00)  |
| T324 | -0.20(±0.01) | 0.42(±0.03)   | -0.36(±0.02)  | -0.01(±0.00) | -0.14(±0.01) | 0.04(±0.00) | -0.10(±0.01) |
| Q325 | -0.44(±0.05) | -0.19(±0.06)  | 0.37(±0.06)   | -0.06(±0.01) | -0.33(±0.05) | 0.24(±0.00) | -0.08(±0.05) |
| F327 | -0.04(±0.00) | -0.05(±0.00)  | 0.05(±0.00)   | 0.00(±0.00)  | -0.04(±0.00) | 0(±0.00)    | -0.04(±0.00) |
| W328 | -0.03(±0.00) | 0.17(±0.02)   | -0.16(±0.02)  | 0.00(±0.00)  | -0.02(±0.00) | 0.02(±0.00) | 0.00(±0.00)  |
| E329 | -0.14(±0.01) | -8.04(±0.08)  | 7.62(±0.08)   | 0.00(±0.00)  | -0.55(±0.01) | 0.2(±0.00)  | -0.35(±0.01) |
| N330 | -1.36(±0.04) | -0.16(±0.03)  | 0.47(±0.03)   | -0.21(±0.00) | -1.27(±0.04) | 0.3(±0.00)  | -0.97(±0.04) |
| S331 | -0.01(±0.00) | -0.03(±0.01)  | 0.03(±0.00)   | 0.00(±0.00)  | -0.01(±0.00) | 0(±0.00)    | -0.01(±0.00) |
| W349 | -0.04(±0.00) | -0.59(±0.01)  | 0.60(±0.01)   | 0.00(±0.00)  | -0.03(±0.00) | 0(±0.00)    | -0.02(±0.00) |



|      |              |               |               |              |              |             |              |
|------|--------------|---------------|---------------|--------------|--------------|-------------|--------------|
| D350 | -0.03(±0.00) | -8.98(±0.07)  | 8.45(±0.06)   | 0.00(±0.00)  | -0.55(±0.00) | 0.09(±0.00) | -0.46(±0.00) |
| L351 | -0.25(±0.01) | 0.01(±0.01)   | -0.20(±0.01)  | 0.00(±0.00)  | -0.44(±0.01) | 0.01(±0.00) | -0.43(±0.01) |
| K353 | -3.55(±0.17) | 7.45(±0.18)   | -8.78(±0.15)  | -0.60(±0.01) | -5.47(±0.14) | 2.49(±0.00) | -2.99(±0.14) |
| D355 | -0.82(±0.13) | -12.96(±0.15) | 11.70(±0.11)  | -0.08(±0.00) | -2.16(±0.09) | 1.66(±0.00) | -0.49(±0.09) |
| F356 | -0.29(±0.01) | 0.07(±0.02)   | -0.05(±0.02)  | 0.00(±0.00)  | -0.28(±0.01) | 0.02(±0.00) | -0.26(±0.01) |
| R357 | -1.31(±0.03) | 10.30(±0.08)  | -9.92(±0.07)  | -0.11(±0.00) | -1.03(±0.03) | 0.48(±0.00) | -0.56(±0.03) |
| D382 | -0.01(±0.00) | -8.44(±0.05)  | 7.93(±0.05)   | 0.00(±0.00)  | -0.52(±0.00) | 0.09(±0.00) | -0.43(±0.00) |
| M383 | -0.06(±0.00) | -0.25(±0.05)  | 0.27(±0.05)   | 0.00(±0.00)  | -0.04(±0.00) | 0.1(±0.00)  | 0.06(±0.00)  |
| Y385 | -0.03(±0.00) | 0.11(±0.01)   | -0.11(±0.01)  | 0.00(±0.00)  | -0.03(±0.00) | 0(±0.00)    | -0.03(±0.00) |
| Q388 | -0.03(±0.00) | -0.40(±0.02)  | 0.42(±0.02)   | 0.00(±0.00)  | -0.02(±0.00) | 0.02(±0.00) | 0.00(±0.00)  |
| P389 | -0.05(±0.00) | 0.01(±0.01)   | 0.01(±0.01)   | 0.00(±0.00)  | -0.04(±0.00) | 0.01(±0.00) | -0.03(±0.00) |
| F390 | -0.12(±0.00) | -0.14(±0.01)  | 0.15(±0.01)   | 0.00(±0.00)  | -0.11(±0.00) | 0(±0.00)    | -0.11(±0.00) |
| R393 | -1.07(±0.04) | 12.49(±0.11)  | -11.89(±0.10) | -0.16(±0.00) | -0.63(±0.04) | 0.64(±0.00) | 0.02(±0.04)  |
| S19  | 0.04(±0.07)  | -0.46(±0.06)  | 0.37(±0.04)   | -0.06(±0.00) | -0.11(±0.06) | 0.39(±0.00) | 0.28(±0.06)  |
| T20  | -0.05(±0.00) | -0.06(±0.02)  | 0.08(±0.02)   | 0.00(±0.00)  | -0.03(±0.00) | 0.03(±0.00) | 0.00(±0.00)  |
| I21  | -0.21(±0.01) | -0.09(±0.01)  | 0.11(±0.01)   | 0.00(±0.00)  | -0.19(±0.01) | 0.01(±0.00) | -0.19(±0.01) |
| E22  | -0.03(±0.00) | -11.22(±0.07) | 10.54(±0.06)  | 0.00(±0.00)  | -0.71(±0.00) | 0.16(±0.00) | -0.55(±0.00) |
| E23  | -0.36(±0.02) | -14.70(±0.18) | 13.98(±0.17)  | -0.03(±0.00) | -1.11(±0.02) | 0.80(±0.00) | -0.31(±0.02) |
| Q24  | -3.29(±0.10) | -1.91(±0.09)  | 1.79(±0.07)   | -0.52(±0.01) | -3.93(±0.08) | 1.39(±0.00) | -2.53(±0.08) |
| K26  | -0.19(±0.01) | 15.26(±0.22)  | -14.26(±0.20) | -0.01(±0.00) | 0.81(±0.01)  | 0.87(±0.00) | 1.68(±0.01)  |
| T27  | -2.09(±0.07) | -0.64(±0.03)  | 0.90(±0.03)   | -0.36(±0.00) | -2.19(±0.07) | 0.78(±0.00) | -1.41(±0.07) |
| F28  | -1.05(±0.03) | -0.70(±0.03)  | 0.94(±0.02)   | -0.05(±0.00) | -0.86(±0.03) | 0.05(±0.00) | -0.80(±0.03) |
| L29  | -0.07(±0.00) | -0.26(±0.01)  | 0.27(±0.01)   | 0.00(±0.00)  | -0.06(±0.00) | 0.01(±0.00) | -0.05(±0.00) |
| D30  | -0.09(±0.09) | -22.89(±0.35) | 21.15(±0.30)  | -0.21(±0.01) | -2.04(±0.09) | 2.20(±0.00) | 0.16(±0.09)  |
| K31  | -3.03(±0.13) | 9.41(±0.24)   | -9.44(±0.23)  | -0.61(±0.01) | -3.66(±0.11) | 2.92(±0.00) | -0.74(±0.11) |
| F32  | -0.10(±0.00) | -0.25(±0.01)  | 0.27(±0.01)   | 0.00(±0.00)  | -0.08(±0.00) | 0.01(±0.00) | -0.07(±0.00) |
| N33  | -0.07(±0.00) | 0.61(±0.02)   | -0.58(±0.02)  | 0.00(±0.00)  | -0.04(±0.00) | 0.03(±0.00) | -0.01(±0.00) |
| H34  | -3.47(±0.08) | -1.06(±0.12)  | 1.79(±0.10)   | -0.49(±0.01) | -3.22(±0.08) | 0.97(±0.00) | -2.25(±0.08) |
| E35  | -0.77(±0.11) | -16.60(±0.18) | 15.26(±0.16)  | -0.19(±0.00) | -2.31(±0.09) | 2.25(±0.00) | -0.05(±0.09) |
| E37  | -0.75(±0.11) | -20.80(±0.30) | 19.31(±0.25)  | -0.29(±0.01) | -2.52(±0.11) | 2.12(±0.00) | -0.40(±0.11) |
| D38  | -0.89(±0.16) | -19.42(±0.16) | 17.28(±0.13)  | -0.44(±0.01) | -3.48(±0.13) | 2.95(±0.00) | -0.53(±0.13) |
| L39  | -0.17(±0.01) | -0.14(±0.01)  | 0.15(±0.01)   | 0.00(±0.00)  | -0.16(±0.01) | 0.01(±0.00) | -0.15(±0.01) |
| F40  | -0.06(±0.00) | -0.13(±0.00)  | 0.16(±0.00)   | 0.00(±0.00)  | -0.04(±0.00) | 0.00(±0.00) | -0.04(±0.00) |
| Y41  | -4.80(±0.10) | 0.06(±0.09)   | 0.20(±0.06)   | -0.52(±0.01) | -5.06(±0.10) | 1.20(±0.00) | -3.86(±0.10) |
| Q42  | -1.91(±0.11) | -1.73(±0.11)  | 0.73(±0.07)   | -0.42(±0.01) | -3.32(±0.10) | 1.15(±0.00) | -2.17(±0.10) |
| S43  | -0.01(±0.00) | 0.06(±0.02)   | -0.04(±0.01)  | 0.00(±0.00)  | 0.01(±0.00)  | 0.01(±0.00) | 0.02(±0.00)  |
| S44  | -0.01(±0.00) | 0.25(±0.01)   | -0.23(±0.01)  | 0.00(±0.00)  | 0.01(±0.00)  | 0.00(±0.00) | 0.02(±0.00)  |
| L45  | -1.17(±0.04) | 0.29(±0.01)   | -0.18(±0.01)  | -0.13(±0.01) | -1.19(±0.04) | 0.09(±0.00) | -1.10(±0.04) |
| W48  | -0.11(±0.00) | 0.19(±0.02)   | -0.17(±0.02)  | 0.00(±0.00)  | -0.09(±0.00) | 0.03(±0.00) | -0.06(±0.00) |
| N49  | -0.06(±0.00) | 0.13(±0.03)   | -0.08(±0.02)  | 0.00(±0.00)  | -0.01(±0.00) | 0.04(±0.00) | 0.02(±0.00)  |
| T52  | -0.01(±0.00) | -0.10(±0.00)  | 0.10(±0.00)   | 0.00(±0.00)  | -0.01(±0.00) | 0.00(±0.00) | -0.01(±0.00) |
| N61  | -0.03(±0.00) | -0.17(±0.03)  | 0.19(±0.02)   | 0.00(±0.00)  | -0.01(±0.00) | 0.04(±0.00) | 0.04(±0.00)  |
| K68  | -0.09(±0.01) | 11.79(±0.10)  | -11.01(±0.10) | 0.00(±0.00)  | 0.68(±0.01)  | 0.31(±0.00) | 0.99(±0.01)  |
| W69  | -0.06(±0.00) | -0.61(±0.01)  | 0.64(±0.01)   | 0.00(±0.00)  | -0.04(±0.00) | 0.01(±0.00) | -0.03(±0.00) |
| F72  | -0.15(±0.00) | -0.16(±0.01)  | 0.22(±0.02)   | 0.00(±0.00)  | -0.09(±0.00) | 0.01(±0.00) | -0.08(±0.00) |
| E75  | -0.13(±0.01) | -9.38(±0.11)  | 8.89(±0.10)   | 0.00(±0.00)  | -0.61(±0.01) | 0.43(±0.00) | -0.18(±0.01) |
| Q76  | -0.23(±0.01) | -0.61(±0.03)  | 0.72(±0.03)   | 0.00(±0.00)  | -0.12(±0.00) | 0.06(±0.00) | -0.07(±0.00) |
| S77  | 0.00(±0.00)  | 0.12(±0.00)   | -0.12(±0.00)  | 0.00(±0.00)  | 0.00(±0.00)  | 0.00(±0.00) | 0.00(±0.00)  |
| T78  | -0.03(±0.00) | 0.17(±0.00)   | -0.15(±0.00)  | 0.00(±0.00)  | -0.01(±0.00) | 0.00(±0.00) | -0.01(±0.00) |

Delta

|      |              |               |               |              |              |             |              |
|------|--------------|---------------|---------------|--------------|--------------|-------------|--------------|
| L79  | -1.74(±0.05) | 0.01(±0.01)   | 0.36(±0.01)   | -0.24(±0.01) | -1.60(±0.05) | 0.35(±0.00) | -1.25(±0.05) |
| Q81  | -0.02(±0.00) | -0.02(±0.01)  | 0.03(±0.01)   | 0.00(±0.00)  | -0.01(±0.00) | 0.01(±0.00) | 0.00(±0.00)  |
| M82  | -1.79(±0.06) | -0.14(±0.08)  | 0.61(±0.09)   | -0.26(±0.01) | -1.58(±0.07) | 0.62(±0.00) | -0.96(±0.07) |
| Y83  | -2.50(±0.12) | -2.21(±0.07)  | 2.21(±0.04)   | -0.53(±0.01) | -3.03(±0.10) | 1.62(±0.00) | -1.41(±0.10) |
| P84  | -0.06(±0.00) | 0.04(±0.00)   | -0.05(±0.00)  | 0.00(±0.00)  | -0.06(±0.00) | 0.00(±0.00) | -0.06(±0.00) |
| E87  | -0.02(±0.00) | -10.17(±0.07) | 9.55(±0.06)   | 0.00(±0.00)  | -0.63(±0.00) | 0.17(±0.00) | -0.47(±0.00) |
| I88  | -0.03(±0.00) | 0.05(±0.00)   | -0.04(±0.00)  | 0.00(±0.00)  | -0.03(±0.00) | 0.00(±0.00) | -0.03(±0.00) |
| L97  | -0.06(±0.00) | 0.06(±0.01)   | -0.04(±0.01)  | 0.00(±0.00)  | -0.04(±0.00) | 0.00(±0.00) | -0.03(±0.00) |
| L100 | -0.04(±0.00) | 0.15(±0.00)   | -0.14(±0.00)  | 0.00(±0.00)  | -0.02(±0.00) | 0.00(±0.00) | -0.02(±0.00) |
| Q101 | -0.02(±0.00) | 0.46(±0.01)   | -0.45(±0.01)  | 0.00(±0.00)  | 0.00(±0.00)  | 0.00(±0.00) | 0.00(±0.00)  |
| M323 | -0.02(±0.00) | -0.10(±0.05)  | 0.10(±0.05)   | 0.00(±0.00)  | -0.02(±0.00) | 0.03(±0.00) | 0.01(±0.00)  |
| T324 | -0.19(±0.01) | 0.29(±0.03)   | -0.22(±0.03)  | -0.01(±0.00) | -0.13(±0.01) | 0.04(±0.00) | -0.09(±0.01) |
| Q325 | -0.64(±0.07) | -0.19(±0.07)  | 0.40(±0.07)   | -0.10(±0.01) | -0.53(±0.07) | 0.36(±0.00) | -0.17(±0.07) |
| F327 | -0.04(±0.00) | -0.05(±0.00)  | 0.05(±0.00)   | 0.00(±0.00)  | -0.04(±0.00) | 0.00(±0.00) | -0.04(±0.00) |
| W328 | -0.03(±0.00) | 0.19(±0.02)   | -0.16(±0.02)  | 0.00(±0.00)  | -0.01(±0.00) | 0.02(±0.00) | 0.01(±0.00)  |
| E329 | -0.10(±0.01) | -9.96(±0.08)  | 9.41(±0.08)   | 0.00(±0.00)  | -0.65(±0.01) | 0.23(±0.00) | -0.42(±0.01) |
| N330 | -1.31(±0.04) | -0.22(±0.03)  | 0.52(±0.03)   | -0.20(±0.00) | -1.21(±0.04) | 0.29(±0.00) | -0.91(±0.04) |
| S331 | -0.01(±0.00) | -0.03(±0.01)  | 0.03(±0.01)   | 0.00(±0.00)  | -0.01(±0.00) | 0.00(±0.00) | -0.01(±0.00) |
| W349 | -0.03(±0.00) | -0.70(±0.01)  | 0.70(±0.01)   | 0.00(±0.00)  | -0.03(±0.00) | 0.00(±0.00) | -0.02(±0.00) |
| D350 | -0.03(±0.00) | -11.39(±0.07) | 10.71(±0.07)  | 0.00(±0.00)  | -0.71(±0.01) | 0.10(±0.00) | -0.60(±0.01) |
| L351 | -0.24(±0.01) | 0.01(±0.01)   | -0.20(±0.01)  | 0.00(±0.00)  | -0.43(±0.01) | 0.01(±0.00) | -0.43(±0.01) |
| K353 | -4.45(±0.14) | 10.81(±0.14)  | -12.39(±0.12) | -0.60(±0.01) | -6.63(±0.12) | 2.33(±0.00) | -4.30(±0.12) |
| D355 | -0.44(±0.12) | -15.56(±0.13) | 14.06(±0.10)  | -0.09(±0.00) | -2.03(±0.10) | 1.94(±0.00) | -0.09(±0.10) |
| F356 | -0.29(±0.01) | 0.10(±0.02)   | -0.10(±0.02)  | 0.00(±0.00)  | -0.28(±0.01) | 0.02(±0.00) | -0.27(±0.01) |
| R357 | -1.13(±0.04) | 12.79(±0.08)  | -12.24(±0.07) | -0.09(±0.00) | -0.67(±0.04) | 0.39(±0.00) | -0.28(±0.04) |
| D382 | -0.01(±0.00) | -10.15(±0.05) | 9.53(±0.05)   | 0.00(±0.00)  | -0.63(±0.00) | 0.08(±0.00) | -0.55(±0.00) |
| M383 | -0.06(±0.00) | -0.22(±0.05)  | 0.23(±0.05)   | 0.00(±0.00)  | -0.04(±0.00) | 0.08(±0.00) | 0.03(±0.00)  |
| Y385 | -0.03(±0.00) | 0.12(±0.01)   | -0.12(±0.01)  | 0.00(±0.00)  | -0.02(±0.00) | 0.00(±0.00) | -0.02(±0.00) |
| Q388 | -0.03(±0.00) | -0.42(±0.02)  | 0.43(±0.02)   | 0.00(±0.00)  | -0.02(±0.00) | 0.02(±0.00) | -0.01(±0.00) |
| P389 | -0.05(±0.00) | 0.01(±0.01)   | 0.00(±0.01)   | 0.00(±0.00)  | -0.04(±0.00) | 0.01(±0.00) | -0.03(±0.00) |
| F390 | -0.10(±0.00) | -0.17(±0.01)  | 0.18(±0.01)   | 0.00(±0.00)  | -0.08(±0.00) | 0.00(±0.00) | -0.08(±0.00) |
| R393 | -0.69(±0.04) | 14.72(±0.12)  | -13.98(±0.11) | -0.08(±0.00) | -0.04(±0.04) | 0.55(±0.00) | 0.51(±0.04)  |
